# Supplementary material for: Prevalence and Predisposing Factors for Depressive Status in Chinese Patients with Obstructive Sleep Apnoea: A Large-Sample Survey
Source: PLoS One. 2016 Mar 2;11(3):e0149939. doi: 10.1371/journal.pone.0149939 (PMC4774961; doi:10.1371/journal.pone.0149939)
Supplement: S1 Dataset — (XLS) [file pone.0149939.s001.xls]

## Sheet: Sheet1
Age	Gender	Marital status	Job category	Education level	Smoking status	Alcohol intake	BMI	AHI	Hypoxemia	FBS	APGAR	PSSS	Hypertension	Heart disease	Diabetes mellitus	Depressive status	Depressive status
1	1	1	2	3	1	3	3	2	3	2	1	3	2	1	1	1	1
2	1	1	2	4	2	4	1	1	1	0	2	1	1	2	2	1	1
1	2	2	1	2	3	4	2	3	2	1	2	2	2	1	1	1	1
2	1	1	2	2	1	4	3	1	1	0	2	3	2	1	1	2	2
1	2	1	2	4	2	3	1	2	3	1	3	1	2	2	2	2	2
2	1	1	2	2	4	4	3	3	1	1	1	1	1	2	2	4	2
2	1	1	1	3	1	1	3	2	2	2	3	3	2	1	1	2	2
2	2	1	1	1	1	1	1	2	1	2	1	1	1	1	1	1	1
2	1	2	2	2	3	1	2	2	3	0	1	1	2	2	2	3	2
1	1	2	1	2	2	3	1	3	3	0	1	1	2	1	1	4	2
2	2	2	1	2	4	1	2	1	3	2	2	3	2	1	2	2	2
1	1	1	2	4	4	1	3	3	2	0	2	1	1	2	1	2	2
2	2	1	2	2	3	4	1	3	3	2	1	1	2	1	1	2	2
1	1	1	1	2	4	1	3	1	1	1	3	2	1	1	1	3	2
2	2	1	1	3	3	1	1	2	2	0	1	2	1	2	2	1	1
1	1	1	1	2	4	1	2	3	3	1	3	2	2	2	2	2	2
2	1	1	2	3	1	3	2	1	2	2	1	1	2	2	1	3	2
1	1	1	2	2	3	3	2	2	1	1	2	3	2	1	1	1	1
2	2	2	2	2	4	1	3	1	3	1	1	3	1	1	1	2	2
2	1	1	2	3	1	2	1	3	3	0	2	2	2	2	1	2	2
1	1	1	1	2	4	1	3	3	2	2	2	3	2	1	2	2	2
2	1	1	2	2	1	1	3	3	3	1	3	3	2	2	1	2	2
1	2	1	1	2	2	2	2	2	1	0	2	1	1	1	2	1	1
1	2	2	1	2	3	4	2	1	3	2	3	2	1	2	2	2	2
2	1	2	1	2	1	1	3	3	1	2	3	1	1	1	2	3	2
1	1	1	2	2	1	2	3	3	3	1	3	1	2	1	1	1	1
2	1	1	2	2	4	4	3	1	2	2	1	1	2	1	1	1	1
1	2	1	1	2	2	1	2	1	1	0	1	3	2	1	1	4	2
1	1	1	1	2	3	2	1	3	3	0	2	1	1	1	1	1	1
1	1	1	2	2	1	1	1	3	1	0	2	3	1	2	1	2	2
2	1	1	1	2	4	4	3	1	2	1	3	1	2	1	1	2	2
1	2	1	1	3	4	1	2	1	3	0	1	1	2	1	1	3	2
1	2	1	2	2	4	1	3	3	1	2	2	3	1	1	1	1	1
1	1	2	2	2	1	1	1	3	1	1	1	2	2	2	2	1	1
2	1	1	1	3	2	1	3	2	2	0	2	1	1	1	1	1	1
1	2	1	2	2	1	4	3	3	1	2	3	3	2	2	2	1	1
2	2	1	2	2	4	2	1	2	3	0	2	2	2	1	1	1	1
2	2	1	1	1	1	1	1	1	3	0	3	1	1	2	2	2	2
2	1	1	2	3	4	3	1	2	1	1	1	1	1	1	1	3	2
1	1	1	1	2	1	1	3	2	1	1	3	1	1	2	1	1	1
2	1	2	2	2	2	1	2	3	2	2	1	3	2	1	1	2	2
2	1	1	2	2	1	1	3	3	2	1	1	1	2	1	1	4	2
1	2	1	1	2	1	1	3	3	2	1	3	2	1	2	1	2	2
2	1	1	2	2	4	1	1	3	2	2	3	1	2	1	1	1	1
2	1	1	1	1	4	2	3	3	3	0	2	1	1	1	1	1	1
1	1	1	1	2	1	1	3	2	2	2	1	1	2	1	1	3	2
1	2	2	2	2	4	1	1	3	3	2	3	1	2	2	1	2	2
2	1	1	2	2	4	3	3	1	3	0	2	2	2	1	1	2	2
2	1	1	2	2	1	2	3	3	2	2	3	1	2	2	1	1	1
1	2	1	2	2	1	1	3	3	3	2	1	1	1	2	1	2	2
1	1	1	1	4	4	1	1	1	3	1	2	3	2	1	2	1	1
2	2	1	2	2	2	1	3	3	3	2	3	2	1	2	1	1	1
1	1	1	2	3	4	4	3	2	3	1	2	1	2	1	1	1	1
2	1	1	1	2	4	1	3	3	2	0	3	3	1	1	1	2	2
1	2	1	1	2	3	1	1	3	3	2	2	3	1	1	1	1	1
1	1	2	2	3	1	1	2	1	3	2	3	2	1	2	1	2	2
2	1	1	2	2	1	1	2	3	2	0	3	2	2	1	2	1	1
2	2	2	1	2	4	3	2	2	2	0	1	1	2	2	1	4	2
2	1	1	1	3	3	1	1	2	1	0	1	1	1	1	2	3	2
2	1	1	2	2	4	3	1	2	1	1	2	1	2	2	1	1	1
1	1	2	2	2	1	3	1	2	3	2	1	1	2	1	2	2	2
2	1	1	1	2	4	1	3	3	2	1	3	1	2	2	1	2	2
1	1	1	2	4	4	2	2	3	2	1	1	3	2	2	1	3	2
2	1	1	2	2	2	3	1	3	3	2	1	1	2	1	1	3	2
1	1	2	2	2	1	1	2	1	3	1	3	1	1	2	1	2	2
1	1	1	2	2	4	3	3	3	3	2	1	3	2	1	1	3	2
2	1	1	2	2	1	3	2	3	1	1	1	2	2	1	1	4	2
1	1	1	1	2	4	4	1	2	2	0	2	3	2	1	1	2	2
2	2	1	1	4	4	1	2	1	2	2	1	3	1	1	1	1	1
1	1	1	2	2	1	1	1	3	1	0	3	1	2	1	1	1	1
2	1	1	2	3	1	1	3	3	3	1	3	1	1	1	1	2	2
1	1	1	1	2	4	4	3	1	3	1	1	2	2	1	1	3	2
2	2	1	2	2	1	1	2	3	2	2	3	1	1	1	2	3	2
2	1	1	2	2	4	4	2	2	2	1	2	2	2	1	2	1	1
2	2	2	2	2	3	1	2	1	3	0	2	2	1	1	2	2	2
1	1	1	1	3	4	1	1	3	3	2	2	2	1	1	1	1	1
2	2	1	2	2	4	2	3	3	3	2	1	1	2	1	1	1	1
2	1	1	1	2	1	4	3	2	3	0	1	2	2	1	1	3	2
2	2	2	2	2	3	2	2	3	2	0	1	3	2	1	1	1	1
1	1	1	1	3	4	3	1	1	1	2	3	1	1	1	1	1	1
2	2	1	2	2	1	1	2	3	3	1	2	2	2	2	1	1	1
1	1	1	2	2	4	2	1	3	1	0	1	3	1	1	1	1	1
2	1	1	1	1	1	1	3	1	1	2	2	2	2	2	1	1	1
1	1	1	1	2	1	1	1	1	2	1	3	1	1	1	1	2	2
2	2	1	2	3	4	1	1	1	1	0	1	1	2	1	1	4	2
1	1	1	2	4	2	3	1	1	3	1	1	1	2	1	1	3	2
2	2	1	2	2	4	1	2	2	1	2	2	1	2	2	1	2	2
1	1	1	2	2	4	1	2	3	2	0	2	1	1	1	1	1	1
2	2	1	1	3	1	4	3	1	3	2	3	2	2	1	1	1	1
2	1	1	2	4	3	4	2	2	3	1	2	1	2	1	2	1	1
1	1	2	2	2	4	3	3	3	3	1	1	2	2	1	1	4	2
2	1	2	1	3	1	1	2	2	2	2	3	2	1	2	2	3	2
2	2	1	1	2	1	1	1	2	2	0	2	2	2	1	2	2	2
2	1	1	2	2	4	3	3	3	3	2	3	3	2	1	1	2	2
2	1	1	2	2	4	1	3	1	3	2	2	2	2	2	1	2	2
2	2	1	1	3	1	2	2	2	2	0	1	1	2	2	2	4	2
2	2	1	1	2	4	1	1	1	3	1	2	3	1	2	2	1	1
2	1	1	2	2	4	2	3	3	1	0	1	1	2	1	1	3	2
1	2	2	2	2	1	4	2	2	2	0	3	1	2	1	1	1	1
1	1	1	2	3	1	1	1	1	2	0	3	1	1	2	1	2	2
2	1	1	1	2	4	3	3	3	3	1	3	3	2	1	1	2	2
1	1	1	2	2	4	1	3	2	2	2	3	3	1	1	1	2	2
2	1	1	2	3	1	1	3	1	3	0	2	1	2	2	1	2	2
1	1	1	1	2	4	1	2	3	3	2	1	3	2	1	1	2	2
2	1	1	2	2	3	1	3	2	2	1	2	2	2	1	1	2	2
2	1	1	1	2	1	1	1	2	1	1	2	1	1	1	1	1	1
1	1	1	2	2	2	2	1	1	3	0	3	1	1	2	1	2	2
1	1	1	2	2	4	1	2	1	2	2	2	1	2	1	2	1	1
2	2	1	1	2	1	1	2	1	1	2	3	1	2	2	1	2	2
1	1	1	2	2	4	3	3	2	3	1	3	3	1	1	1	2	2
1	2	1	1	4	1	4	2	1	3	0	1	1	1	1	1	3	2
2	1	1	1	2	4	1	3	1	2	0	3	1	2	2	1	2	2
2	1	1	2	3	4	4	2	3	2	1	2	2	2	1	2	3	2
1	2	1	2	2	1	1	2	3	1	1	2	2	1	1	2	2	2
2	1	1	1	3	4	4	1	2	1	0	1	3	2	1	2	4	2
2	2	2	1	2	2	1	2	2	3	2	3	2	1	1	1	1	1
2	1	1	2	1	4	4	3	3	3	0	3	1	2	1	1	1	1
2	1	1	1	2	4	1	1	1	2	0	1	2	1	2	1	2	2
1	1	1	2	2	4	1	3	3	1	2	1	1	1	2	1	4	2
2	1	1	1	2	3	1	2	1	1	1	1	3	2	2	1	1	1
1	1	1	2	3	1	3	3	2	2	0	3	1	1	1	1	1	1
1	1	1	2	2	2	1	2	2	1	2	3	2	2	2	2	1	1
1	2	1	1	2	4	1	3	1	3	0	1	2	1	1	1	1	1
1	1	1	1	2	1	1	2	2	2	1	2	3	2	2	1	2	2
1	1	2	1	3	1	1	1	2	3	0	1	1	1	1	1	3	2
2	1	1	2	2	1	2	2	2	1	1	2	3	2	1	2	1	1
1	1	2	2	2	1	1	1	3	3	0	3	1	2	1	1	2	2
2	1	1	1	2	4	1	2	2	2	0	2	3	2	2	1	1	1
1	2	1	2	3	4	1	3	2	3	2	3	1	1	1	1	1	1
1	1	2	2	4	1	1	2	1	1	2	2	2	2	1	1	1	1
2	2	1	1	2	3	4	3	3	2	0	3	3	1	1	2	1	1
1	1	1	2	2	2	2	2	3	3	1	2	2	2	2	1	1	1
1	1	1	2	2	1	1	2	1	3	2	3	2	1	1	2	1	1
2	2	1	2	3	4	2	3	2	3	0	2	3	2	2	1	1	1
1	1	2	1	3	1	1	2	2	1	1	1	1	2	2	1	2	2
2	1	1	1	2	4	3	1	1	3	1	3	1	1	1	1	1	1
1	2	1	2	2	4	1	3	3	1	0	2	3	2	1	1	1	1
2	1	1	2	4	1	1	1	3	2	0	1	2	2	1	2	2	2
1	1	1	2	2	1	1	2	3	3	1	3	2	2	1	1	3	2
1	1	2	1	2	1	1	1	1	1	1	1	2	2	1	1	4	2
2	2	1	1	2	1	1	2	1	2	0	3	2	1	2	1	1	1
2	1	1	2	2	1	1	3	1	3	2	3	3	2	1	1	2	2
2	1	1	2	3	3	4	1	3	3	0	2	3	2	1	2	3	2
1	1	1	1	2	4	3	3	3	3	1	1	2	1	2	1	2	2
2	2	1	2	2	4	1	3	2	2	1	3	3	1	1	2	1	1
2	2	1	2	2	4	2	3	3	1	0	1	1	1	1	1	4	2
1	1		2	2	4	1	2	2	1	0	2	1	2	1	1	1	1
1	1	1	2	2	3	3	3	3	1	2	1	1	1	1	1	3	2
2	1	1	2	4	4	4	3	2	3	2	1	3	2	1	1	3	2
1	1	1	2	3	1	1	1	1	3	0	3	3	2	1	1	2	2
2	1	1	1	2	4	4	2	1	2	2	3	2	1	1	2	1	1
2	1	1	1	3	4	1	3	2	3	1	1	3	2	2	1	2	2
1	1	1	2	2	2	1	2	3	2	2	2	2	2	1	1	2	2
2	2	1	2	2	4	1	1	2	2	0	2	1	1	2	1	1	1
1	2	1	1	4	3	2	3	1	3	2	2	2	2	1	1	1	1
1	1	1	2	2	4	1	3	3	1	1	2	1	1	2	1	1	1
2	1	1	2	3	4	3	3	2	3	0	3	3	2	1	1	1	1
1	1	1	1	3	1	4	2	2	2	1	2	2	2	1	2	4	2
1	1	1	1	2	1	3	2	2	2	2	1	2	2	1	1	1	1
1	2	1	1	2	1	1	2	1	2	2	1	1	1	1	1	3	2
1	1	1	1	2	1	1	1	1	2	0	1	1	1	2	2	2	2
2	1	1	2	2	1	1	1	1	2	0	3	3	1	2	1	1	1
1	2	1	1	2	2	1	3	2	3	2	3	1	2	1	1	1	1
1	1	1	2	4	1	1	2	2	1	1	3	2	1	2	1	1	1
2	2	1	2	2	1	1	2	2	3	1	1	2	1	2	1	2	2
2	1	1	2	3	4	3	1	3	3	1	1	1	2	1	1	4	2
2	1	2	2	2	3	4	3	1	2	2	2	2	2	1	2	1	1
1	1	1	1	3	1	2	2	3	1	0	1	1	1	1	1	1	1
2	1	1	2	2	4	1	3	2	3	1	2	1	1	1	1	3	2
1	1	1	1	4	1	1	2	1	2	0	3	1	2	2	1	2	2
1	1	1	2	3	4	2	1	2	2	2	2	2	2	1	1	1	1
2	1	1	2	2	1	2	3	1	3	0	3	3	1	1	2	1	1
2	1	2	2	3	4	1	3	3	3	2	3	2	2	1	1	2	2
1	1	1	1	2	1	1	2	3	2	2	1	2	1	1	2	3	2
2	1	2	1	2	4	2	2	1	2	1	1	2	1	2	1	1	1
2	2	1	2	3	4	1	3	2	2	0	3	1	2	1	1	2	2
1	1	1	1	4	2	3	3	1	3	2	1	3	2	1	1	2	2
2	2	2	2	2	4	1	2	2	2	0	2	1	2	1	1	4	2
1	1	1	2	2	4	1	1	2	1	0	2	3	1	2	1	1	1
2	1	2	2	2	1	1	2	1	1	1	3	2	1	2	1	2	2
1	1	1	2	3	3	1	2	2	1	1	1	2	2	1	1	3	2
2	1	1	1	4	3	1	1	1	2	0	1	2	1	1	1	1	1
1	2	1	2	2	2	2	2	3	1	2	2	1	2	2	1	1	1
1	1	1	2	3	1	4	2	2	3	1	1	1	2	1	1	1	1
2	2	1	1	2	1	2	3	3	1	2	1	1	2	1	2	4	2
2	1	2	1	3	1	3	1	3	2	0	1	2	2	1	1	3	2
2	2	1	1	2	4	1	1	2	2	0	3	3	1	1	2	1	1
1	1	1	2	2	1	2	2	1	1	1	2	2	2	1	1	1	1
2	1	1	1	3	1	3	3	3	3	2	3	1	1	1	1	1	1
2	1	1	2	2	2	1	1	1	2	0	2	1	2	2	1	1	1
1	1	1	2	2	1	2	3	2	1	1	2	1	2	1	1	1	1
2	1	1	2	2	4	1	2	2	3	2	3	2	1	2	1	1	1
2	1	1	1	2	1	3	1	1	2	0	1	3	1	2	2	2	2
1	2	1	2	2	3	4	3	2	3	2	3	1	2	1	1	2	2
1	1	1	2	2	4	1	1	1	3	0	1	1	1	2	2	3	2
2	1	1	2	2	4	3	2	3	3	1	2	2	2	1	1	2	2
1	2	2	1	3	4	1	1	1	1	2	2	3	1	2	1	1	1
1	1	1	2	4	4	4	3	2	3	0	3	2	2	1	2	1	1
1	2	2	1	2	1	1	3	2	2	0	1	1	1	2	1	2	2
1	1	1	1	3	4	1	1	3	2	1	1	1	2	1	2	4	2
2	1	1	1	2	1	3	3	2	3	1	1	1	2	1	1	3	2
2	1	1	1	2	1	1	1	1	2	0	3	3	1	1	2	1	1
1	1	1	2	2	4	3	3	3	1	2	2	1	2	1	1	1	1
1	1	1	1	4	3	1	2	2	3	1	2	2	1	2	1	1	1
2	1	1	2	2	4	2	3	3	3	0	1	1	2	1	1	1	1
1	2	1	2	3	4	3	3	1	1	1	3	3	2	2	1	1	1
2	1	2	2	2	1	4	2	1	1	2	1	2	1	1	1	4	2
1	1	1	2	3	1	1	3	1	2	2	1	2	1	1	1	3	2
1	1	2	1	2	1	3	3	1	1	0	3	1	1	2	1	2	2
2	1	1	1	2	4	2	1	1	1	0	1	3	1	1	1	1	1
1	2	1	2	2	4	1	3	2	2	2	2	1	2	1	1	1	1
2	1	1	2	2	1	4	1	2	2	1	3	1	2	1	2	2	2
1	1	1	1	2	1	4	2	2	3	1	1	2	1	1	1	1	1
2	1	1	2	3	4	1	3	1	1	2	2	3	2	1	2	1	1
1	2	1	1	2	3	3	3	1	3	0	1	1	2	1	1	2	2
2	1	1	2	3	4	1	2	3	2	2	3	1	1	1	1	2	2
2	1	1	2	2	1	1	1	2	2	0	2	2	1	2	1	1	1
2	2	1	2	2	2	1	2	3	3	0	1	1	2	1	2	3	2
1	1	2	2	3	1	3	3	1	3	0	2	2	1	2	1	2	2
2	2	1	2	2	4	1	1	2	3	1	1	1	2	2	2	4	2
2	1	1	1	3	1	4	2	2	1	0	1	3	1	2	2	1	1
1	2	1	2	2	3	1	1	3	2	1	2	1	2	1	1	1	1
2	1	1	2	4	1	3	3	1	3	2	3	2	1	1	1	1	1
1	2	1	1	2	4	2	3	2	1	2	1	2	2	1	2	1	1
2	1	1	2	2	4	1	1	3	1	1	2	2	2	2	1	1	1
1	2	1	1	2	1	2	1	1	1	0	2	1	1	2	2	2	2
1	1	1	2	2	1	2	2	2	2	2	3	2	2	1	1	1	1
1	1	1	2	3	1	1	2	1	3	0	1	2	2	1	1	3	2
2	2	1	1	2	4	1	2	1	1	0	2	3	2	1	1	1	1
1	1	1	1	2	4	3	2	2	1	0	1	1	2	1	1	4	2
1	1	2	2	4	3	1	2	2	1	0	3	2	2	1	1	2	2
2	1	1	1	2	4	3	3	3	3	1	1	3	1	1	1	3	2
1	2	1	1	2	2	4	3	3	2	1	2	1	1	1	1	1	1
2	1	1	2	3	3	1	1	2	1	0	1	2	2	2	1	1	1
1	1	1	1	2	1	1	3	3	2	2	3	2	2	1	1	2	2
2	2	1	2	3	4	4	2	1	3	1	3	1	2	2	1	2	2
1	1	1	2	2	4	1	3	3	3	0	3	3	1	1	1	2	2
2	1	1	2	3	4	2	3	3	3	1	1	3	2	1	1	4	2
1	1	1	2	1	4	1	2	2	3	1	1	2	2	1	1	3	2
2	1	1	1	2	4	1	2	1	2	1	2	2	1	2	2	1	1
1	1	1	2	3	4	2	1	3	3	2	1	2	2	1	1	1	1
1	1	1	1	2	1	3	3	3	2	0	2	2	1	1	1	2	2
2	2	1	2	2	3	2	1	1	1	2	3	1	2	2	1	2	2
2	1	1	2	2	4	2	3	3	3	2	1	1	1	1	1	3	2
1	2	2	1	2	1	3	1	1	2	2	1	1	2	1	1	4	2
1	1	1	1	2	1	1	3	1	1	0	1	3	1	1	1	1	1
2	1	1	2	4	4	2	2	2	2	2	2	1	2	1	2	1	1
1	1	2	1	2	1	2	1	3	2	0	3	1	1	1	1	2	2
1	1	1	1	2	3	1	2	1	2	0	3	1	2	1	2	3	2
2	1	1	2	3	4	1	3	1	3	2	1	1	2	2	2	2	2
2	1	1	1	2	3	3	1	1	1	1	2	2	2	2	1	1	1
2	1	1	2	2	4	1	3	3	2	0	1	3	1	1	2	1	1
2	1	1	2	3	1	1	3	2	2	2	3	1	2	1	1	1	1
2	2	1	2	2	3	2	3	3	3	1	1	2	2	2	1	3	2
1	2	1	2	2	4	1	3	2	1	2	1	1	2	1	1	1	1
2	1	1	1	3	1	4	1	3	3	2	3	1	1	2	1	1	1
2	1	1	2	3	4	3	2	2	1	1	2	3	2	1	1	4	2
1	2	1	2	2	4	3	3	1	1	1	1	2	2	1	1	1	1
1	1	2	1	2	1	4	2	1	2	1	1	1	1	2	1	2	2
1	1	2	2	4	1	3	2	3	3	2	1	3	1	1	1	3	2
2	1	1	1	2	4	1	1	2	2	0	2	3	1	2	2	1	1
1	1	1	2	2	4	1	1	2	3	0	1	2	2	1	1	2	2
1	1	1	2	3	4	1	3	3	3	0	3	3	1	2	2	4	2
1	2	1	2	2	1	1	2	1	3	2	1	1	2	1	1	1	1
2	1	1	2	2	2	4	3	3	1	1	3	2	1	1	1	1	1
1	1	1	2	2	1	3	2	1	3	1	1	3	1	1	1	2	2
2	1	1	1	3	2	1	3	3	2	2	1	1	2	2	1	2	2
1	1	1	1	2	1	1	1	2	2	2	3	3	2	1	2	1	1
2	1	1	2	2	3	2	3	1	1	0	2	1	2	1	1	1	1
2	2	2	2	2	1	4	3	1	3	0	2	2	2	1	1	2	2
1	1	1	2	2	4	1	1	2	2	1	1	1	2	1	1	2	2
2	1	2	1	2	1	4	1	3	3	2	2	2	2	1	1	4	2
2	1	1	2	2	1	3	3	3	3	1	2	3	2	2	1	2	2
2	1	1	1	2	4	2	2	3	1	2	1	3	2	1	2	2	2
2	1	1	1	2	3	1	1	1	2	0	1	3	2	2	1	1	1
1	1	1	2	3	2	4	3	2	1	1	3	1	1	1	1	1	1
1	2	1	2	2	4	1	1	3	3	1	1	2	1	1	1	2	2
1	1	2	2	2	1	1	2	2	3	0	2	2	2	1	1	1	1
1	1	1	1	3	1	1	3	2	1	0	1	2	2	1	2	3	2
2	1	1	2	2	4	1	1	3	3	2	2	2	2	1	2	1	1
1	2	1	2	2	3	1	2	1	3	1	2	1	2	1	1	4	2
1	1	1	2	2	4	3	3	1	1	0	2	1	2	2	1	1	1
1	1	1	1	2	1	3	3	2	2	0	3	1	1	2	1	2	2
1	1	1	1	3	1	2	3	2	2	2	1	1	2	1	1	1	1
2	1	1	2	2	4	1	2	3	3	2	2	2	2	1	1	1	1
1	1	1	2	3	4	1	2	3	3	2	1	2	2	1	1	2	2
1	1	1	2	2	4	1	1	1	1	1	1	3	2	1	1	1	1
2	2	1	2	2	1	1	1	3	1	0	1	1	2	2	1	2	2
2	1	1	1	2	3	3	2	3	2	0	3	2	2	1	2	1	1
1	1	1	2	2	2	3	3	2	2	2	2	1	2	1	1	1	1
1	1	1	2	2	1	1	2	3	2	2	1	3	2	2	1	1	1
2	2	1	1	3	1	3	1	2	2	2	3	1	2	1	1	4	2
2	1	1	2	2	4	4	3	1	2	1	2	1	2	1	2	1	1
1	2	1	1	2	1	1	3	1	3	1	1	2	2	2	1	2	2
2	1	1	2	2	4	1	1	2	3	0	2	3	1	2	1	1	1
1	1	1	2	4	1	3	3	3	1	2	1	1	2	1	1	1	1
1	1	1	2	3	4	1	3	1	3	2	3	3	2	1	2	1	1
1	1	1	2	2	1	3	2	2	2	0	3	1	1	1	1	2	2
2	1	1	2	4	4	3	3	2	3	0	1	1	2	1	2	4	2
1	2	1	1	3	1	4	1	1	1	0	1	2	2	2	1	3	2
2	1	1	1	3	1	1	1	2	1	1	3	1	2	2	1	1	1
2	1	2	1	3	1	1	1	1	1	1	1	2	2	2	1	2	2
1	1	1	2	2	4	3	3	2	2	2	1	2	2	1	1	1	1
2	1	1	2	2	1	4	2	1	3	0	3	3	2	1	1	1	1
1	1	2	2	2	4	4	2	3	3	2	2	1	2	1	1	4	2
1	2	1	2	2	4	1	2	3	2	2	2	2	2	1	2	1	1
1	1	1	2	2	1	3	3	3	1	2	3	2	2	1	1	1	1
1	1	1	2	4	1	4	2	2	1	0	1	1	1	2	1	2	2
2	1	1	2	2	4	1	2	2	2	0	3	3	1	2	1	1	1
1	1	1	2	3	1	3	2	2	2	1	1	2	1	1	2	3	2
2	1	1	1	2	1	2	1	2	2	2	3	1	2	1	2	4	2
2	1	1	2	2	1	4	1	1	2	2	1	2	2	1	2	1	1
1	1	1	2	4	1	1	3	3	1	1	3	1	2	1	1	1	1
2	2	1	1	2	1	3	2	3	1	2	3	3	1	1	1	1	1
1	1	2	2	2	1	1	1	1	3	0	1	2	2	1	1	2	2
2	1	1	2	3	3	1	3	2	2	0	2	1	2	2	1	1	1
1	1	1	2	2	4	2	1	1	1	2	2	1	2	1	1	1	1
1	2	1	2	2	4	1	3	1	3	1	2	3	2	1	1	4	2
2	1	1	2	3	1	1	3	2	3	2	1	1	2	1	1	1	1
1	1	1	1	2	4	3	3	3	1	2	3	3	2	1	2	1	1
1	1	1	1	3	4	1	2	3	1	0	2	1	1	2	2	2	2
2	1	1	2	2	1	1	1	3	2	0	3	1	2	1	2	1	1
1	1	1	2	2	1	1	3	1	1	2	1	3	1	1	1	1	1
2	1	1	1	2	1	4	2	2	2	1	3	1	2	2	1	1	1
1	1	1	2	2	2	1	3	3	3	2	3	2	1	1	2	1	1
1	2	1	2	3	1	2	3	1	1	1	1	1	2	1	1	2	2
2	1	1	2	2	2	1	1	1	3	0	2	3	2	1	1	1	1
1	1	1	1	2	3	2	3	3	2	2	1	1	2	1	1	1	1
1	1	1	2	3	4	3	2	2	1	2	2	1	2	2	1	1	1
2	2	2	1	2	3	3	2	3	3	0	3	1	2	2	2	4	2
1	1	1	2	3	1	1	3	3	3	0	2	3	1	1	1	1	1
2	1	1	1	2	1	1	3	1	3	2	3	3	2	1	1	3	2
2	1	1	2	2	4	3	3	3	1	2	1	1	2	1	1	1	1
2	1	1	2	4	4	1	1	2	2	1	1	1	1	1	2	3	2
1	1	1	2	2	4	1	1	1	2	1	3	2	1	1	1	1	1
1	1	1	1	3	1	3	1	3	2	1	2	2	2	1	1	2	2
2	1	1	1	2	1	3	3	2	1	0	1	3	2	2	2	1	1
2	1	2	2	2	1	3	2	2	3	0	2	1	2	2	1	2	2
2	1	1	2	2	1	1	1	3	3	2	3	1	2	1	1	1	1
1	1	1	2	2	1	3	3	2	2	2	3	3	2	1	1	1	1
2	2	1	1	2	4	1	2	3	3	0	1	1	2	1	1	1	1
1	2	1	2	2	1	1	2	1	1	1	2	2	2	2	1	1	1
1	1	1	1	3	4	1	1	1	3	1	1	2	2	2	2	2	2
2	1	1	2	2	3	3	3	2	2	0	3	1	2	1	1	2	2
2	1	1	2	4	4	1	1	2	2	0	1	3	1	2	2	1	1
1	1	1	1	2	3	1	3	1	2	2	3	1	2	1	1	1	1
2	1	1	2	3	1	4	2	3	1	2	1	2	2	2	1	1	1
1	1	1	2	3	4	1	3	2	3	1	2	3	2	1	2	1	1
1	2	2	2	2	1	3	2	2	3	1	1	2	1	2	1	2	2
2	2	1	1	3	3	4	3	3	3	2	2	1	2	1	1	2	2
1	1	2	2	3	1	1	2	2	1	0	2	2	1	1	1	3	2
1	2	1	2	2	1	1	1	3	2	0	1	1	2	1	1	2	2
2	1	1	1	2	2	4	1	1	1	0	3	2	1	1	1	1	1
1	1	1	2	2	1	1	3	3	2	2	2	1	2	1	1	1	1
1	1	1	1	4	4	3	2	1	2	2	1	1	2	2	2	3	2
2	2	1	2	2	1	1	1	2	1	0	3	3	2	2	2	1	1
2	1	1	2	2	1	1	3	1	2	2	3	1	1	1	1	1	1
2	1	1	1	2	1	3	2	3	3	1	1	3	2	1	1	1	1
1	2	1	2	3	3	1	2	2	2	0	2	1	2	1	1	1	1
2	1	1	2	2	2	1	1	1	1	2	3	2	2	2	1	1	1
1	2	1	1	2	1	4	2	2	3	0	1	1	1	2	1	2	2
2	1	1	1	2	4	1	1	3	2	0	1	3	1	1	2	1	1
1	2	1	2	2	1	1	3	1	1	2	2	1	2	1	1	1	1
2	1	2	2	3	1	1	2	2	3	1	2	2	2	2	1	1	1
1	2	1	1	4	4	4	3	2	3	0	3	3	2	1	1	1	1
2	1	1	2	2	4	1	1	3	2	2	1	1	2	1	1	1	1
1	2	2	2	2	1	3	1	1	3	1	1	2	2	1	2	2	2
1	1	1	2	2	4	3	2	1	1	2	3	1	1	2	1	1	1
2	1	1	1	3	4	1	2	3	2	0	1	3	2	1	1	1	1
1	2	1	2	3	4	1	1	3	3	0	1	2	2	1	1	3	2
2	1	1	2	2	4	2	3	2	3	2	3	1	2	1	1	1	1
1	1	1	1	2	3	1	3	3	1	1	2	2	2	1	1	1	1
1	1	1	1	2	1	1	3	2	3	0	2	3	1	1	1	2	2
1	2	2	1	1	4	4	1	1	1	0	3	1	1	2	2	4	2
2	1	1	2	2	4	1	1	1	1	0	1	3	2	1	2	1	1
2	2	1	2	3	4	1	3	3	1	1	3	2	2	1	1	2	2
2	1	1	2	2	3	3	1	3	2	2	2	3	1	1	1	2	2
2	1	2	1	4	1	1	3	3	3	1	3	1	1	1	1	3	2
2	1	1	2	2	1	1	1	2	1	2	1	2	2	2	1	1	1
1	1	2	1	2	1	4	2	2	3	0	2	1	2	1	1	2	2
1	1	1	1	2	3	1	3	1	2	1	3	3	2	1	2	1	1
2	1	1	2	3	4	1	3	3	2	2	1	1	2	1	1	4	2
2	1	1	2	2	1	4	2	3	2	2	3	1	1	1	1	1	1
1	1	1	2	2	4	1	1	1	2	1	3	2	1	1	2	2	2
1	1	1	2	2	4	3	2	2	1	2	2	1	2	1	1	4	2
2	2	1	2	2	4	1	1	2	1	2	1	3	2	1	1	1	1
2	2	1	2	2	1	1	2	2	3	0	3	1	2	2	2	3	2
2	1	1	2	3	3	2	2	2	1	1	1	3	2	1	1	2	2
2	1	1	2	2	1	1	3	2	3	1	1	3	2	1	1	4	2
2	1	1	1	3	1	1	2	1	2	0	1	2	2	1	1	1	1
1	2	1	2	2	4	2	1	3	2	1	3	2	2	1	1	2	2
1	2	1	2	2	3	1	1	2	3	1	2	2	1	1	1	1	1
2	1	1	2	4	2	3	3	1	2	0	3	1	2	2	1	1	1
1	1	1	1	3	1	1	3	2	1	2	3	3	2	1	1	1	1
1	1	2	1	2	1	1	3	3	1	0	1	2	2	1	1	2	2
2	2	1	2	2	4	3	1	3	3	2	1	1	2	1	2	1	1
1	1	1	1	2	4	3	1	1	3	2	2	1	2	1	2	4	2
1	1	1	1	2	4	1	2	2	2	1	2	1	2	1	1	1	1
2	1	1	2	3	3	4	1	3	3	1	1	2	2	1	1	3	2
2	2	1	2	2	1	1	2	3	2	2	1	1	2	1	1	1	1
1	1	1	2	2	2	4	3	3	1	0	3	3	2	1	1	1	1
1	1	1	1	4	4	1	1	1	2	0	3	1	1	1	2	2	2
2	1	1	1	2	1	4	3	2	2	2	2	1	1	2	2	1	1
2	1	2	2	2	2	2	2	3	3	0	1	2	2	1	1	4	2
1	1	1	2	2	4	1	3	3	3	2	1	2	2	1	1	1	1
1	2	1	2	4	1	1	2	2	1	1	3	2	2	2	2	2	2
1	1	1	2	2	1	1	2	1	2	0	2	3	2	1	1	1	1
2	1	1	1	2	1	1	3	3	1	2	1	1	2	1	1	1	1
1	1	1	1	2	1	1	1	1	1	2	1	2	2	1	2	3	2
2	1	1	2	3	1	1	1	2	3	0	2	2	2	2	1	1	1
1	2	2	2	4	4	1	3	1	2	1	3	1	2	1	1	1	1
1	1	1	1	3	1	3	2	3	3	2	1	1	2	1	1	1	1
1	1	1	2	2	4	1	1	2	1	0	3	2	1	2	1	1	1
1	2	1	2	3	4	1	1	2	1	0	3	2	1	1	1	2	2
2	2	1	2	2	4	3	2	1	2	1	1	2	2	1	2	1	1
1	1	1	1	2	4	1	1	3	3	0	1	2	2	2	1	4	2
2	1	1	1	1	4	2	3	2	1	0	2	1	1	1	1	1	1
1	1	1	1	2	1	1	2	3	2	2	2	3	2	1	1	2	2
2	1	2	2	3	4	4	2	3	3	0	3	2	2	1	2	2	2
2	1	1	1	2	4	1	1	1	2	2	1	3	1	1	2	1	1
1	1	1	2	2	3	1	3	3	1	0	2	1	2	1	1	1	1
1	2	1	1	2	4	3	2	2	1	1	2	2	2	1	1	1	1
1	1	1	2	3	1	1	1	3	2	2	1	3	2	2	2	1	1
2	1	1	2	2	3	4	3	1	3	0	3	1	2	1	1	1	1
1	1	1	1	2	1	1	2	3	1	2	3	1	1	1	1	1	1
2	1	2	2	3	2	1	3	2	3	1	1	2	2	1	1	1	1
1	1	1	2	2	1	1	1	1	2	2	3	3	2	1	2	1	1
1	1	1	1	2	1	4	1	1	3	1	1	1	1	2	2	2	2
2	1	1	1	2	4	1	2	3	3	0	3	1	2	2	1	1	1
1	1	2	2	2	4	1	3	3	2	1	1	1	1	1	1	4	2
1	1	1	2	2	4	2	2	2	1	2	2	3	1	1	1	1	1
2	1	1	2	2	4	3	2	2	3	0	1	1	2	1	2	4	2
2	2	1	1	3	1	1	3	2	2	1	3	2	2	2	1	1	1
1	1	1	2	2	3	1	1	2	3	0	2	2	2	1	1	2	2
2	1	1	2	2	4	2	3	3	1	1	2	1	1	1	2	2	2
1	1	1	1	3	1	1	2	1	1	1	1	1	1	2	2	3	2
1	1	1	2	2	1	3	1	1	1	0	2	3	2	1	1	1	1
2	1	1	1	2	4	1	3	3	2	1	3	1	2	1	1	1	1
1	1	1	1	4	1	3	3	1	3	2	1	1	2	1	1	4	2
1	1	1	2	2	1	2	2	3	2	1	1	2	2	1	2	1	1
2	1	1	1	2	1	1	1	2	1	2	3	3	1	2	1	1	1
1	1	1	1	2	1	1	2	2	1	0	2	1	2	1	2	2	2
2	1	1	2	4	3	1	2	2	2	2	1	2	2	1	1	3	2
2	2	1	2	2	2	1	2	2	1	2	3	1	2	1	1	1	1
2	1	2	2	2	4	1	2	2	3	2	2	3	2	1	1	4	2
1	1	1	2	3	4	1	2	1	3	1	1	2	2	1	1	1	1
1	1	1	2	2	4	4	3	2	3	0	1	3	2	1	1	4	2
2	1	1	1	2	1	4	3	3	2	2	2	2	2	2	1	1	1
1	2	1	1	2	1	1	2	1	3	1	1	2	1	1	2	2	2
2	1	1	2	3	4	1	1	2	1	0	3	3	2	1	1	1	1
2	1	1	2	3	4	1	3	3	3	2	3	1	2	1	1	4	2
1	1	1	2	2	4	4	2	1	3	2	2	1	1	1	1	1	1
2	2	1	2	2	4	3	3	3	1	1	1	3	2	1	1	1	1
1	1	1	2	2	3	1	3	2	3	2	2	2	2	1	1	1	1
2	1	1	2	3	1	1	1	2	2	0	3	2	2	2	2	2	2
2	1	1	2	2	4	2	2	3	2	1	3	1	2	1	1	1	1
2	1	2	2	3	4	1	1	2	3	2	1	1	2	2	2	4	2
1	1	1	2	2	4	2	3	2	2	0	3	3	2	2	2	1	1
1	1	1	1	2	1	1	1	2	3	1	1	1	2	2	1	3	2
2	2	2	1	2	3	1	1	3	2	2	1	3	1	1	1	1	1
1	1	1	2	4	2	2	3	2	1	0	3	1	2	1	1	1	1
2	1	1	2	2	4	1	2	3	3	1	1	1	2	1	1	1	1
1	1	1	2	3	4	3	3	2	1	2	2	3	2	2	1	1	1
2	1	2	2	2	2	1	2	3	2	0	2	3	2	1	1	3	2
1	1	1	1	2	4	1	1	3	1	0	1	1	1	1	1	4	2
2	2	1	2	2	1	1	1	1	2	0	1	3	1	1	1	1	1
1	1	1	2	3	3	4	3	3	3	2	3	2	2	1	1	1	1
2	1	1	1	2	1	1	3	2	3	1	2	3	2	2	1	1	1
1	1	1	2	2	1	3	1	1	3	2	1	2	2	1	1	1	1
2	1	1	2	2	4	2	3	3	2	0	3	1	2	2	1	1	1
1	1	2	1	2	1	1	1	1	1	0	2	1	2	1	2	2	2
1	2	1	2	4	4	1	2	2	1	2	1	3	1	1	1	1	1
2	1	1	1	2	1	2	3	1	3	1	3	2	2	1	1	1	1
2	1	1	2	3	3	3	3	1	3	1	1	2	2	1	1	4	2
1	1	1	2	2	4	2	3	2	2	0	1	3	2	2	1	1	1
1	1	2	1	4	1	4	2	2	3	2	1	1	2	1	2	4	2
2	2	1	2	2	4	1	2	3	2	2	3	1	1	1	1	1	1
1	1	1	1	2	1	2	3	1	1	1	1	3	2	1	1	1	1
2	1	1	1	4	1	1	2	2	3	0	2	2	2	1	1	2	2
2	1	1	2	2	1	1	3	1	1	1	2	2	1	1	1	3	2
2	1	1	2	2	4	1	2	2	3	0	3	2	2	1	1	1	1
1	1	1	2	3	4	1	2	1	3	1	2	3	2	1	1	2	2
2	1	1	2	2	4	1	3	1	1	2	1	1	2	1	1	1	1
2	1	1	2	2	4	1	1	3	2	0	1	3	2	2	2	2	2
1	1	1	2	2	1	4	1	2	2	0	3	3	1	2	1	1	1
2	1	1	2	3	2	3	3	3	3	1	1	2	2	1	1	1	1
1	1	1	2	2	4	3	2	1	3	0	2	1	2	1	1	1	1
1	1	1	1	2	4	1	1	2	3	2	1	2	2	2	2	3	2
2	1	1	1	2	4	4	2	3	2	2	2	1	1	1	1	4	2
1	1	1	1	2	4	4	2	2	3	0	1	3	2	1	1	1	1
1	1	1	1	3	1	1	1	2	1	0	3	1	1	2	2	2	2
1	1	1	2	3	1	2	3	2	2	1	3	2	2	1	2	1	1
1	2	2	2	2	4	3	1	2	1	0	1	3	2	1	1	4	2
2	1	1	2	2	1	1	2	1	3	0	3	3	1	2	1	1	1
1	1	1	2	2	2	4	3	3	2	2	1	1	2	1	1	1	1
2	1	1	1	2	1	1	2	2	3	1	3	2	2	1	1	1	1
1	1	1	2	3	1	1	2	3	3	0	3	2	2	1	2	2	2
1	1	1	2	4	4	1	3	1	1	0	2	3	2	1	2	1	1
1	1	1	2	2	1	2	2	3	2	1	1	2	2	1	1	1	1
1	2	1	2	2	1	3	2	3	1	2	2	1	2	2	1	3	2
2	2	1	2	2	4	2	3	2	3	1	3	1	1	1	1	1	1
1	1	1	1	2	3	2	3	3	2	0	3	2	2	2	1	1	1
1	1	1	1	2	1	2	3	3	1	2	1	1	2	2	1	4	2
2	1	1	2	2	4	1	2	1	1	2	2	3	2	1	1	1	1
1	1	1	2	3	4	3	1	2	3	1	3	1	2	1	1	1	1
1	1	1	1	2	4	1	1	1	1	0	2	1	2	1	1	2	2
2	2	1	1	2	4	1	3	1	2	0	3	3	1	1	1	1	1
1	2	1	2	2	3	1	1	3	1	2	2	2	2	2	1	1	1
1	1	1	2	3	4	4	3	2	3	1	2	1	2	1	2	1	1
1	1	1	2	2	1	1	2	1	2	0	1	3	2	2	1	1	1
1	1	2	2	3	1	1	2	2	3	1	3	2	1	1	2	2	2
2	1	2	2	4	1	2	1	1	2	2	1	1	2	1	2	4	2
2	1	1	1	2	3	1	1	2	1	2	3	2	1	1	1	1	1
1	1	1	2	2	1	3	3	1	3	0	3	1	2	1	2	1	1
1	1	1	2	4	3	1	2	3	1	1	1	2	1	2	1	3	2
2	1	1	2	2	4	2	1	3	2	1	1	3	2	1	1	1	1
1	2	1	1	4	3	3	3	2	1	0	2	1	2	2	1	1	1
2	2	1	2	2	1	1	2	1	3	2	2	2	2	1	2	1	1
1	1	1	2	3	4	2	1	3	2	1	2	1	1	1	1	1	1
1	1	1	1	2	1	1	2	2	1	0	3	3	2	1	1	1	1
2	1	2	1	2	1	1	2	1	3	0	2	1	1	2	1	2	2
1	1	1	1	1	3	1	2	3	1	1	1	2	1	1	1	4	2
2	1	1	1	2	4	1	2	1	2	0	1	2	2	2	2	1	1
1	2	1	2	2	1	1	1	2	1	2	3	3	2	1	1	1	1
1	1	1	2	2	4	4	2	3	1	1	2	1	1	1	1	1	1
2	1	1	1	4	1	1	3	3	1	2	1	2	2	1	2	1	1
1	2	1	2	2	4	1	1	1	1	0	3	3	2	2	1	1	1
2	1	1	1	2	2	4	2	1	1	0	2	2	2	1	1	3	2
2	1	1	2	2	2	2	2	2	2	2	2	2	2	1	1	1	1
1	1	1	1	3	1	2	2	1	3	0	1	2	2	1	2	1	1
1	1	1	2	2	1	1	2	2	1	0	1	1	2	1	2	2	2
1	2	1	2	2	1	1	3	3	1	2	3	3	2	2	1	1	1
1	1	2	1	2	4	4	1	2	3	0	1	1	2	1	1	4	2
2	1	1	2	3	2	4	1	1	2	0	1	3	1	1	1	1	1
1	1	1	1	2	1	1	3	2	1	2	3	1	2	1	1	1	1
1	2	1	2	2	1	3	2	3	3	1	3	2	1	1	2	1	1
2	1	1	2	3	1	1	1	1	2	0	3	1	2	1	1	1	1
2	1	1	2	2	3	3	3	2	2	2	1	3	2	2	2	1	1
1	2	1	2	2	1	1	1	3	2	1	2	1	1	1	1	3	2
2	1	1	2	3	1	3	2	3	2	2	1	3	2	1	1	4	2
2	1	1	1	2	4	2	2	3	1	0	1	2	2	1	1	1	1
1	2	1	2	2	1	1	3	1	1	0	3	1	1	2	2	2	2
2	1	1	2	2	4	2	3	2	3	2	2	1	1	1	1	1	1
1	1	1	2	2	1	1	2	3	2	2	3	3	2	2	1	1	1
2	1	1	1	2	4	1	1	2	3	1	3	2	2	1	2	2	2
2	1	1	1	2	4	1	2	3	1	0	1	1	2	1	2	1	1
1	1	1	2	2	4	4	3	2	3	2	3	2	2	1	1	1	1
2	2	2	1	4	4	1	2	1	3	1	1	2	2	1	1	3	2
1	1	1	2	2	4	1	1	2	1	2	3	1	2	1	1	1	1
2	1	1	1	2	1	2	3	1	2	0	1	3	2	1	1	1	1
1	1	1	2	3	4	2	2	3	1	1	2	2	2	1	2	1	1
1	1	2	1	2	4	1	1	3	3	1	2	1	2	2	1	4	2
1	1	2	2	4	1	1	1	3	1	0	2	1	2	1	1	2	2
1	2	1	2	2	1	3	1	2	1	0	3	3	1	2	1	1	1
2	1	1	1	2	4	1	3	1	3	2	1	1	2	1	2	1	1
1	1	1	2	3	1	2	2	2	2	1	3	2	1	1	1	1	1
2	1	1	2	3	3	1	3	3	2	0	1	2	2	2	2	3	2
2	1	1	2	2	4	2	1	1	1	0	3	3	2	1	1	1	1
2	1	1	2	2	3	1	2	1	1	1	1	2	1	2	1	2	2
2	1	1	1	2	1	4	2	2	3	2	1	3	2	2	1	1	1
1	2	1	2	2	4	1	1	3	1	0	3	1	2	1	1	1	1
1	1	1	2	4	3	3	3	1	3	2	3	2	1	1	1	1	1
2	1	1	2	2	4	1	2	3	2	1	2	3	2	1	1	1	1
1	1	1	1	2	1	1	2	2	2	0	3	1	1	1	2	2	2
1	2	1	2	2	1	1	2	2	3	2	1	2	2	1	1	1	1
1	1	1	1	3	4	3	2	1	1	0	2	1	1	1	2	4	2
2	1	1	1	2	2	2	3	2	2	0	3	1	2	2	2	1	1
2	2	1	2	2	4	4	1	3	3	1	1	2	2	1	1	2	2
1	1	2	2	3	1	1	1	3	3	2	3	3	2	1	1	1	1
2	2	1	1	4	4	3	3	1	1	0	1	2	1	1	1	1	1
2	1	1	2	2	1	1	2	3	3	1	3	1	2	1	1	1	1
1	1	1	2	3	4	2	3	2	1	0	2	3	2	2	2	1	1
1	1	1	2	2	4	1	1	2	1	1	1	3	1	2	1	3	2
1	1	1	2	2	1	1	2	2	1	0	2	1	2	2	1	2	2
2	1	1	1	2	2	1	1	1	1	2	1	3	1	1	1	1	1
1	1	1	2	2	1	3	3	3	3	0	2	1	2	1	1	1	1
2	2	1	2	2	3	1	2	2	2	2	3	2	1	1	1	1	1
1	1	1	1	2	1	4	3	1	1	1	3	3	2	2	1	1	1
1	1	2	2	4	4	3	1	3	2	2	1	3	2	1	1	4	2
2	1	1	2	2	3	1	1	3	1	2	1	2	2	1	1	1	1
1	1	1	2	2	3	2	2	2	3	0	3	3	2	1	2	1	1
1	1	1	1	2	4	1	2	1	3	1	1	1	1	1	1	1	1
1	2	1	2	3	1	4	1	1	3	1	1	2	1	2	1	2	2
1	1	2	2	2	1	1	2	3	2	1	2	1	2	1	1	3	2
2	1	1	2	3	1	3	1	1	1	0	3	2	1	2	2	1	1
1	1	1	1	2	1	1	3	2	3	2	2	3	2	1	1	1	1
1	1	1	2	4	4	3	2	3	1	1	3	1	2	2	2	1	1
2	1	2	2	2	4	1	1	2	3	0	1	3	2	1	1	1	1
1	1	1	2	3	1	4	3	1	2	2	2	1	1	2	1	1	1
1	1	1	1	2	4	1	2	2	3	0	3	2	2	1	1	1	1
2	1	1	2	3	4	3	1	3	1	1	3	3	2	1	2	1	1
1	2	1	1	2	1	1	1	2	3	0	1	1	2	1	2	2	2
2	1	1	2	2	1	1	3	3	3	2	1	1	1	1	1	1	1
1	1	2	1	2	1	1	2	3	1	1	1	1	2	1	2	4	2
2	1	1	1	2	4	1	1	1	1	0	2	3	1	2	2	1	1
2	1	1	1	2	4	1	3	1	1	2	2	1	1	2	1	3	2
1	2	1	2	4	1	4	2	2	3	1	1	2	2	1	1	1	1
2	2	1	2	3	3	2	1	1	1	0	2	3	1	2	1	4	2
2	1	1	2	2	4	2	2	1	2	1	3	3	2	1	1	1	1
1	2	1	2	2	4	1	2	2	2	1	2	3	1	2	1	2	2
2	1	1	2	3	4	3	1	3	1	1	1	2	2	1	1	2	2
2	1	1	1	1	1	1	2	2	1	0	1	2	1	2	2	1	1
2	1	1	2	2	3	3	3	3	3	0	2	1	2	1	1	2	2
2	1	1	2	2	1	4	2	3	3	0	3	1	2	1	2	3	2
1	2	1	2	4	1	1	3	3	1	1	1	1	2	2	2	2	2
2	1	1	2	2	3	1	1	1	3	0	3	3	2	1	1	1	1
2	2	2	2	2	4	3	2	2	3	1	1	2	1	1	1	2	2
2	1	1	1	3	2	1	3	2	1	0	3	1	2	1	2	1	1
2	1	1	2	2	4	1	3	3	3	1	3	2	2	1	1	3	2
1	2	1	2	2	4	3	2	2	3	1	1	3	2	1	1	1	1
2	1	1	1	2	1	1	1	3	2	2	3	1	2	2	1	2	2
2	1	1	2	3	2	2	3	3	3	0	2	3	2	1	1	2	2
2	2	1	1	2	1	1	3	1	1	0	2	2	2	1	1	1	1
1	1	1	2	3	2	2	2	3	2	2	1	2	2	1	2	1	1
1	1	1	2	2	4	1	1	2	1	2	1	3	1	1	1	3	2
2	1	1	2	2	1	1	2	2	1	1	3	3	1	2	1	1	1
1	1	1	1	4	4	4	1	2	1	0	3	1	2	1	2	4	2
1	1	1	2	2	4	1	1	3	2	0	1	1	2	1	2	1	1
1	2	1	1	3	1	3	1	2	2	1	1	2	1	1	1	2	2
2	2	1	2	2	4	1	3	3	3	2	2	3	2	2	2	2	2
1	1	1	1	3	3	1	2	1	1	1	1	3	1	1	1	1	1
2	1	1	1	2	4	3	2	3	2	2	2	1	2	1	1	2	2
2	1	1	2	2	1	1	1	2	2	0	3	2	2	1	2	1	1
1	1	1	2	2	1	1	3	3	1	0	1	1	2	2	2	2	2
2	2	1	2	4	1	4	3	3	2	2	1	2	2	1	1	4	2
1	1	1	1	2	2	1	2	2	3	2	3	1	2	1	1	4	2
1	1	1	1	3	1	3	2	1	3	1	1	3	2	1	1	1	1
2	1	1	1	2	4	1	1	1	1	1	2	2	2	2	1	2	2
2	1	1	2	2	3	1	3	3	1	0	3	1	1	1	2	1	1
1	1	1	2	2	4	4	1	2	3	2	1	2	2	1	1	1	1
2	1	2	1	3	1	2	2	1	1	1	3	3	2	2	1	3	2
1	1	1	2	2	1	1	2	1	3	0	2	3	2	1	1	1	1
2	2	1	2	2	1	3	3	3	3	2	3	1	2	1	2	1	1
2	1	2	2	1	1	4	3	3	1	0	1	3	2	1	1	4	2
1	1	1	2	2	4	2	1	3	1	1	1	2	1	1	1	1	1
1	1	1	1	2	4	1	2	2	2	2	2	3	2	1	1	1	1
1	1	1	1	2	1	3	2	2	2	0	3	1	1	2	1	2	2
2	1	1	2	2	4	1	1	3	3	2	2	3	2	1	1	2	2
2	1	1	2	3	2	3	2	1	1	1	1	2	2	2	1	1	1
2	1	1	2	2	4	1	3	3	2	1	2	2	2	1	1	2	2
1	2	1	2	2	4	3	2	2	1	2	3	1	2	2	1	4	2
1	1	1	2	2	4	1	1	2	2	0	1	3	2	1	1	1	1
2	2	1	1	2	1	1	3	1	3	1	3	2	2	2	2	1	1
1	1	1	1	2	1	2	1	3	1	1	1	3	2	1	2	2	2
2	1	1	2	4	4	4	2	2	3	1	1	1	2	1	1	1	1
1	1	1	2	2	4	1	2	2	1	0	3	1	1	1	1	1	1
2	1	1	2	3	4	1	2	1	1	0	2	1	2	2	2	2	2
2	2	1	1	2	3	1	1	1	3	2	3	2	2	1	2	1	1
1	2	1	2	2	1	3	3	3	1	0	1	3	1	1	1	1	1
2	1	1	2	3	4	1	2	1	2	2	3	2	2	2	1	1	1
1	1	2	1	2	1	2	1	2	3	1	3	1	1	1	1	1	1
2	1	1	2	3	3	2	3	3	1	0	1	3	2	1	2	1	1
1	1	1	2	3	4	1	2	3	2	2	3	2	1	1	1	1	1
2	1	1	2	2	1	3	2	1	1	1	2	1	2	1	1	1	1
1	1	1	2	2	4	2	1	2	2	2	1	3	1	2	2	1	1
1	1	2	1	4	3	3	1	1	3	2	1	1	1	1	1	4	2
1	2	2	1	2	1	2	3	3	1	1	3	2	2	1	1	1	1
1	1	1	1	2	1	1	1	2	3	0	1	1	1	1	1	2	2
2	1	1	2	2	1	3	2	1	3	0	1	3	2	2	1	1	1
1	2	1	1	4	2	1	1	3	1	2	3	2	1	1	2	1	1
2	1	1	2	2	4	3	3	2	3	1	2	1	2	1	1	1	1
1	1	1	2	2	3	1	3	3	2	0	1	3	2	1	1	1	1
2	1	2	2	3	1	1	1	3	1	0	3	1	1	1	2	3	2
2	1	1	2	3	2	1	3	3	2	2	1	3	2	1	1	4	2
2	2	1	1	1	4	2	1	1	2	1	3	2	1	1	2	1	1
2	1	1	2	2	4	4	2	3	3	1	2	3	2	1	1	2	2
1	1	1	2	2	4	1	2	2	1	0	1	3	2	2	1	1	1
1	1	1	2	2	1	3	1	1	2	2	3	1	2	1	2	2	2
2	1	2	1	2	1	2	2	2	2	1	1	3	2	1	1	4	2
2	1	1	1	3	1	2	3	1	1	1	1	3	2	1	1	1	1
1	1	1	2	2	3	3	1	2	2	2	2	1	2	1	2	1	1
2	2	2	2	2	1	2	3	3	1	2	1	2	1	1	1	1	1
1	1	1	1	2	4	1	3	2	2	0	1	2	1	1	1	2	2
2	1	1	2	3	4	3	3	3	3	1	2	1	2	1	1	2	2
2	2	1	1	2	4	2	2	1	3	0	1	3	1	2	1	1	1
1	1	1	2	2	1	4	1	2	2	2	3	2	2	1	2	1	1
1	2	1	2	2	3	1	2	3	1	2	2	1	2	1	1	2	2
1	1	1	1	2	1	1	3	2	1	1	1	3	2	1	1	1	1
1	1	1	2	3	1	3	3	1	1	0	3	2	1	1	1	4	2
2	2	1	1	2	4	2	1	2	2	0	1	2	2	1	1	2	2
2	1	1	2	3	4	1	2	1	2	0	1	3	1	1	1	1	1
1	1	1	2	2	4	4	2	2	1	1	2	3	2	2	2	3	2
2	1	2	2	2	1	1	2	3	1	2	1	1	2	2	1	2	2
1	1	1	1	2	2	1	1	2	1	1	3	2	2	1	1	1	1
2	2	1	2	2	4	1	3	3	3	0	1	3	2	2	2	1	1
1	1	1	2	3	4	1	3	1	3	2	2	2	2	2	2	2	2
2	1	1	2	3	1	3	2	2	2	0	2	1	2	1	1	1	1
1	1	1	1	2	3	4	3	3	3	2	3	1	1	1	1	1	1
2	2	1	2	2	1	2	2	1	1	1	1	3	2	1	1	1	1
1	2	1	1	2	4	1	1	2	2	1	1	1	2	1	2	2	2
2	1	2	1	3	1	2	2	1	2	1	1	1	2	1	1	3	2
1	1	1	1	2	4	1	1	3	2	0	1	2	1	1	2	1	1
2	1	1	2	2	4	4	3	1	2	1	2	3	2	1	1	1	1
1	1	1	2	3	1	2	2	1	2	0	2	2	2	2	1	2	2
1	1	1	2	2	1	3	2	2	1	2	1	2	2	1	1	1	1
2	1	2	2	4	2	1	3	3	2	0	3	3	1	2	2	1	1
1	1	1	1	2	1	3	2	1	3	2	1	1	2	1	1	1	1
2	2	1	1	4	3	1	3	2	1	1	3	2	1	1	1	2	2
2	2	1	2	2	4	1	1	3	1	1	3	2	2	1	1	1	1
2	1	2	2	2	3	2	3	2	2	0	1	3	1	1	2	1	1
1	1	2	2	4	1	1	2	3	3	2	2	2	2	2	1	4	2
1	1	1	1	2	4	4	1	1	1	2	2	1	2	1	1	2	2
1	1	1	2	2	2	3	3	3	1	0	1	1	2	1	2	2	2
1	1	1	2	1	2	2	3	1	3	0	1	2	2	1	1	3	2
2	1	1	1	2	3	1	1	1	1	1	1	3	2	2	1	1	1
1	1	1	2	3	4	1	3	3	2	0	2	2	1	1	2	1	1
1	2	1	2	2	4	1	2	2	3	2	1	1	2	1	1	1	1
2	2	1	2	3	1	4	2	1	3	2	3	3	1	1	1	1	1
2	1	1	2	2	4	3	1	1	2	1	3	1	1	1	2	4	2
2	1	1	1	2	4	1	1	2	1	2	1	2	2	1	2	1	1
1	1	1	1	3	1	1	1	1	1	0	2	1	1	1	1	2	2
2	1	1	2	2	4	2	2	2	2	2	3	2	2	1	1	2	2
1	1	1	2	3	4	1	2	3	3	1	2	2	2	1	1	2	2
2	1	1	2	3	1	1	1	1	1	0	2	1	2	1	2	2	2
2	1	1	2	4	1	1	2	1	1	1	1	3	2	1	1	1	1
1	1	1	2	2	4	3	3	3	3	1	1	2	2	1	1	2	2
1	2	2	2	4	4	4	2	3	3	2	1	3	2	1	1	4	2
2	1	1	1	2	1	4	1	2	1	0	3	3	2	1	2	1	1
2	1	1	2	2	2	1	3	3	3	2	1	2	2	2	1	1	1
1	1	1	2	3	4	3	2	1	2	1	2	1	2	1	1	1	1
2	2	1	1	2	1	1	1	1	2	0	2	1	1	1	1	2	2
2	1	1	1	2	1	1	1	3	1	0	1	3	1	1	2	1	1
2	2	2	2	3	1	3	3	2	3	1	3	2	2	2	1	3	2
2	1	1	2	2	1	1	3	3	1	2	2	3	2	2	1	4	2
1	2	1	2	3	3	1	2	3	2	0	1	3	2	1	2	2	2
2	1	1	1	2	4	3	1	2	1	2	2	2	2	1	1	2	2
1	1	2	2	3	4	1	2	2	2	0	1	3	2	2	2	1	1
2	1	1	1	2	1	3	2	3	1	1	3	2	1	1	1	1	1
2	1	1	2	2	4	1	3	1	2	0	3	2	2	2	1	2	2
2	1	2	2	2	4	2	1	1	2	2	3	1	1	1	1	4	2
1	1	1	2	3	1	1	1	2	1	2	3	1	2	1	1	2	2
1	1	1	1	2	1	1	3	2	2	1	1	3	2	1	1	1	1
2	2	2	2	2	4	1	1	3	3	2	2	3	1	1	2	3	2
2	1	1	2	1	4	1	1	3	2	2	2	2	2	1	1	1	1
1	1	2	2	2	3	4	3	1	1	2	1	3	1	2	1	1	1
2	1	1	1	2	4	1	1	2	2	1	3	1	2	2	1	2	2
2	2	1	1	2	4	3	3	2	3	0	1	2	2	1	1	4	2
2	1	1	2	2	1	2	2	1	1	1	3	2	2	1	2	2	2
2	1	2	1	2	4	1	2	2	1	1	1	3	2	2	1	1	1
1	1	1	2	3	4	4	2	3	3	0	3	1	2	1	1	2	2
1	1	1	2	2	1	3	2	2	3	1	2	3	2	1	1	3	2
1	1	1	2	3	4	1	2	1	1	2	3	3	1	1	2	1	1
2	1	1	2	3	3	3	2	3	3	2	1	1	2	2	1	4	2
1	1	1	1	4	4	1	1	1	2	2	3	3	2	1	2	2	2
2	1	1	1	2	1	1	1	3	2	0	2	2	2	1	1	1	1
1	2	2	2	2	2	1	3	2	3	2	1	3	2	1	1	1	1
2	1	1	2	3	3	1	3	3	1	1	3	1	2	1	1	1	1
2	1	1	2	2	1	1	2	2	1	0	2	2	2	1	1	2	2
1	1	1	1	2	4	4	2	2	3	2	1	3	2	2	1	1	1
2	1	1	2	4	2	1	3	1	2	0	2	2	1	1	1	1	1
2	1	1	2	2	4	1	3	2	2	2	2	2	2	1	1	4	2
2	1	1	2	4	3	3	1	1	1	0	1	2	2	2	1	3	2
1	1	1	1	2	4	1	2	1	1	0	1	1	2	2	1	2	2
2	1	1	1	2	4	1	1	2	1	1	1	3	2	1	1	1	1
2	2	1	2	3	1	4	3	3	2	2	3	3	2	1	1	2	2
2	1	1	2	2	2	1	1	3	3	1	3	1	2	1	1	4	2
1	1	1	1	2	4	1	1	2	2	1	2	2	2	1	1	2	2
1	1	1	1	2	1	1	2	1	2	0	1	3	1	1	1	1	1
2	1	1	2	3	1	3	2	2	1	1	2	1	2	2	2	1	1
1	1	2	2	4	3	1	3	2	3	1	3	2	1	1	1	1	1
1	1	1	1	2	1	4	1	3	1	0	1	3	2	1	1	1	1
2	1	1	2	2	2	1	3	1	3	2	2	1	2	1	1	1	1
1	2	2	2	2	1	2	2	1	3	2	2	2	1	1	1	4	2
2	1	2	2	3	1	3	2	3	2	1	1	3	2	1	1	3	2
2	1	2	1	2	1	1	1	1	1	0	3	1	2	1	2	2	2
2	1	1	2	3	1	1	1	2	2	0	1	3	1	2	2	1	1
1	1	2	1	2	4	3	3	1	3	1	3	2	2	1	1	1	1
2	1	1	2	2	3	2	2	3	1	2	2	3	1	1	1	1	1
2	1	1	2	2	4	1	1	2	2	0	1	1	2	1	2	1	1
1	1	1	1	3	1	4	3	2	1	1	3	3	1	1	1	1	1
2	1	1	2	4	4	1	2	1	3	2	2	2	2	1	1	1	1
1	1	1	2	2	4	1	3	3	1	2	1	1	2	1	1	1	1
2	2	1	1	2	1	3	1	3	2	0	3	3	1	1	2	1	1
1	1	1	2	3	4	2	2	2	2	1	3	1	2	1	1	1	1
2	1	2	1	2	4	1	2	3	1	2	1	1	1	2	2	3	2
1	1	1	2	2	1	1	3	3	1	2	1	2	2	1	1	1	1
1	1	1	1	3	1	1	1	1	2	0	1	3	2	1	1	2	2
2	1	1	2	3	4	3	3	2	1	2	2	2	2	1	1	2	2
1	1	1	2	2	2	1	2	3	3	2	2	1	2	1	1	2	2
2	1	1	1	2	4	1	1	3	2	0	3	2	2	1	1	4	2
1	1	2	2	2	4	1	1	1	1	0	1	3	1	2	1	1	1
1	1	1	2	2	1	3	3	1	2	2	3	1	2	1	1	3	2
2	2	1	1	2	2	3	2	2	2	1	2	2	2	1	2	1	1
2	1	1	1	4	1	1	1	1	2	0	3	2	2	1	2	2	2
2	1	1	2	3	4	3	3	2	1	1	1	1	2	1	2	2	2
1	1	1	2	2	3	1	2	1	1	0	1	3	2	1	1	1	1
1	1	2	2	3	1	4	1	3	3	2	2	1	1	1	1	1	1
2	1	1	2	2	2	3	3	2	3	1	1	2	2	1	2	1	1
1	1	1	1	4	3	1	2	2	2	1	1	3	2	1	1	2	2
2	2	1	2	2	4	1	2	1	1	0	2	3	2	2	1	1	1
1	1	2	2	4	1	4	3	3	1	2	2	1	2	1	1	1	1
1	1	1	1	2	4	1	1	2	2	2	1	3	1	1	2	1	1
2	1	1	2	2	1	1	3	2	3	1	3	3	2	1	1	3	2
2	2	1	2	3	3	1	1	1	1	0	3	2	2	1	1	2	2
2	1	2	2	2	4	1	1	3	3	0	2	1	2	2	1	4	2
2	1	1	2	2	1	4	3	3	3	0	3	1	2	1	1	2	2
1	1	1	1	3	4	3	3	2	2	2	3	3	2	1	1	2	2
2	1	1	1	3	1	1	1	1	1	0	1	3	2	2	2	1	1
1	1	1	2	1	4	1	3	3	3	2	3	2	1	1	1	1	1
2	1	1	2	3	4	1	2	2	2	1	2	3	2	1	1	1	1
1	1	1	1	2	1	1	2	1	2	1	1	2	2	2	1	2	2
2	1	1	1	2	4	1	2	1	1	0	1	2	1	1	2	1	1
2	1	1	2	3	4	1	3	2	1	0	1	1	2	1	2	2	2
1	1	1	2	2	4	1	1	3	2	2	3	3	2	1	1	1	1
1	2	2	2	3	3	4	3	1	2	1	1	1	2	1	1	1	1
2	1	1	2	2	2	1	2	3	1	2	3	2	1	1	1	1	1
1	1	1	1	2	1	2	2	2	3	2	3	3	2	2	2	2	2
2	1	2	2	2	1	3	1	2	3	2	1	3	2	1	1	3	2
2	1	2	1	4	4	4	1	2	1	0	1	2	2	2	1	1	1
1	1	1	2	3	3	1	3	2	3	2	2	3	1	1	1	1	1
2	1	1	2	2	2	2	3	3	3	1	2	3	2	2	2	3	2
2	2	1	1	3	1	3	2	1	2	1	3	1	1	1	1	2	2
2	1	1	2	2	3	1	3	2	3	0	3	2	2	1	1	2	2
1	1	1	1	3	4	1	3	1	3	2	1	2	2	1	1	3	2
2	1	2	1	4	1	1	2	3	1	0	1	3	1	2	2	1	1
1	1	1	2	2	1	3	3	3	3	2	3	1	2	1	1	2	2
2	2	1	2	2	2	1	3	1	2	0	2	3	2	2	1	2	2
1	1	1	2	2	4	2	3	3	1	2	1	3	2	1	1	2	2
1	1	1	1	2	4	1	1	1	1	1	1	3	2	1	1	1	1
2	1	1	1	2	3	2	1	2	2	2	3	2	2	1	1	2	2
2	1	1	2	3	4	1	3	1	3	2	1	1	2	2	1	2	2
1	1	1	2	2	4	3	3	3	2	2	2	3	2	1	1	2	2
1	1	1	1	3	4	1	1	1	2	2	3	2	2	1	1	4	2
2	1	1	2	4	1	4	2	3	1	0	1	2	2	1	2	2	2
1	1	2	2	2	4	2	2	2	3	0	3	1	2	1	1	3	2
2	2	1	2	4	4	3	3	3	3	1	3	1	1	1	2	4	2
2	1	1	1	2	3	4	2	2	3	2	1	3	2	1	1	2	2
2	2	1	2	3	1	2	3	1	3	1	1	1	2	2	1	2	2
2	1	1	2	3	1	3	1	3	2	2	3	3	1	1	1	3	2
2	1	1	1	4	4	1	3	3	2	0	3	3	1	1	1	2	2
2	1	1	2	2	4	3	3	3	3	1	2	3	2	1	2	2	2
2	1	2	2	2	1	1	2	1	2	1	1	3	2	2	2	1	1
1	1	1	1	2	1	2	2	1	1	0	3	3	2	1	1	2	2
2	1	1	2	3	4	2	3	1	3	1	1	3	2	1	1	3	2
1	2	1	2	2	3	1	2	3	1	2	2	1	1	2	1	4	2
2	1	1	2	3	4	1	3	2	2	2	2	2	2	1	1	2	2
2	1	1	1	2	3	1	1	2	1	2	3	2	1	2	1	1	1
2	1	1	2	2	1	3	2	3	3	0	1	2	2	2	1	2	2
2	1	1	2	2	2	1	1	1	1	2	3	1	2	1	1	2	2
1	1	1	1	3	1	2	2	3	3	1	3	1	2	1	1	2	2
2	1	1	1	1	1	1	1	1	1	0	1	3	1	1	2	1	1
1	1	2	2	2	2	3	2	3	3	1	2	2	2	2	1	1	1
1	1	1	1	3	1	1	3	2	2	2	2	1	1	1	1	1	1
1	2	1	1	2	3	4	1	3	3	0	1	3	2	1	2	1	1
2	1	1	2	3	1	1	3	1	1	1	3	2	2	2	1	1	1
1	1	1	2	2	3	3	2	2	2	2	2	1	1	1	1	1	1
1	1	1	1	4	2	1	2	3	2	0	2	3	2	1	1	1	1
2	1	1	2	2	1	1	3	2	1	1	1	1	1	2	1	1	1
2	1	1	1	2	1	1	2	1	1	0	2	2	1	2	2	2	2
1	1	2	2	3	4	3	2	2	2	1	2	2	2	2	1	3	2
2	1	2	2	4	1	2	1	1	2	0	2	2	2	1	1	4	2
1	2	1	2	3	4	3	3	2	3	1	1	3	2	1	1	2	2
2	1	1	1	2	4	1	3	3	2	0	3	1	2	1	1	2	2
2	1	1	2	4	2	1	3	3	1	2	3	3	1	1	1	4	2
2	1	1	1	2	4	1	1	2	2	2	1	2	2	1	2	1	1
1	1	1	1	2	3	2	1	2	1	0	1	1	2	1	2	2	2
1	1	1	2	2	1	1	2	3	1	0	3	3	1	2	1	1	1
2	1	2	1	4	4	4	1	1	3	1	1	1	2	1	1	1	1
1	2	1	2	2	4	1	3	3	1	2	2	2	2	1	1	1	1
1	1	1	1	3	1	3	3	3	2	0	1	3	1	2	2	1	1
2	2	1	2	2	1	1	2	1	3	2	3	1	2	2	1	2	2
2	1	1	1	3	4	1	2	3	2	2	2	2	2	1	1	1	1
1	1	1	1	2	1	1	1	1	1	1	1	2	1	2	1	1	1
2	1	1	2	2	3	4	2	2	2	2	3	2	2	1	1	2	2
2	1	1	1	4	4	3	3	3	3	0	1	1	2	1	2	2	2
1	1	1	1	3	3	4	2	2	1	1	2	2	2	1	1	4	2
1	2	1	2	2	1	1	3	2	2	0	1	3	2	2	1	1	1
2	1	1	2	2	2	1	2	1	3	2	3	1	2	1	2	1	1
2	1	1	1	2	1	2	2	2	2	1	1	1	1	1	2	3	2
1	1	1	1	3	4	1	1	1	2	2	2	2	1	2	1	2	2
1	2	1	1	3	3	3	2	2	1	1	2	2	1	2	1	1	1
2	1	2	2	2	2	4	2	1	3	0	1	3	2	1	1	1	1
1	1	1	2	4	3	3	3	3	2	2	3	1	2	1	2	1	1
1	1	2	2	3	4	1	1	2	3	1	2	3	1	2	1	1	1
2	1	1	1	2	1	2	2	2	2	0	2	1	2	1	1	2	2
2	1	1	2	2	1	3	1	3	1	2	2	3	2	1	1	4	2
2	1	1	2	3	4	1	3	3	1	2	3	1	1		1	2	2
1	1	1	2	4	1	1	3	3	3	0	1	3	2	1	1	4	2
1	1	2	2	2	4	1	1	1	1	0	3	3	2	1	1	3	2
1	2	1	2	3	3	3	3	1	2	1	1	1	2	2	1	2	2
2	2	1	1	3	4	1	1	3	3	2	1	2	2	1	2	2	2
1	1	1	1	2	1	1	2	1	1	0	2	3	1	1	1	1	1
1	1	2	2	2	4	1	3	1	3	0	2	3	2	1	1	2	2
2	1	2	1	2	4	1	2	2	2	1	3	3	1	2	1	4	2
2	1	2	2	2	3	1	1	1	1	1	1	3	2	2	2	1	1
1	1	1	1	1	1	3	3	3	2	0	3	2	2	1	1	1	1
1	1	1	2	3	4	1	3	2	3	2	2	3	1	2	1	1	1
2	1	1	1	2	1	3	2	2	2	2	3	1	1	2	2	2	2
2	2	1	2	2	4	1	2	1	1	2	1	1	2	1	2	1	1
2	1	1	2	2	4	1	2	1	1	0	2	1	2	1	1	2	2
1	1	1	1	2	3	4	1	3	2	1	3	3	1	2	1	1	1
2	1	2	2	3	1	1	3	2	1	0	2	2	2	1	1	1	1
1	1	1	2	2	2	3	2	1	3	2	1	1	1	1	2	1	1
1	1	1	1	3	1	4	1	3	3	2	2	2	2	1	1	2	2
1	1	1	2	2	1	1	3	3	1	1	1	3	2	2	1	1	1
2	1	1	2	4	2	1	3	1	2	0	3	1	1	2	1	2	2
1	1	1	1	2	4	2	1	2	3	0	2	2	2	1	1	1	1
2	2	1	1	2	1	1	3	1	2	1	3	1	2	2	2	1	1
2	1	1	1	2	3	3	2	2	1	0	1	2	2	1	2	2	2
2	1	2	2	3	1	1	1	1	2	1	2	2	1	2	2	3	2
1	1	1	2	2	1	1	1	2	2	0	1	3	1	2	1	1	1
2	1	2	2	2	4	3	3	3	1	2	3	2	2	1	1	1	1
1	1	1	2	3	3	1	2	1	2	1	3	1	2	1	1	1	1
1	1	1	1	2	2	1	3	3	2	2	1	3	2	1	1	4	2
2	1	1	2	4	1	3	1	1	2	0	3	1	2	2	2	2	2
1	1	1	1	2	3	1	2	2	1	2	2	1	2	1	1	2	2
1	2	1	2	1	1	1	2	1	1	2	2	3	2	1	1	4	2
2	1	1	1	2	3	1	1	1	1	0	1	3	1	2	2	1	1
1	1	1	2	2	4	4	3	3	3	2	3	1	2	1	1	1	1
1	1	1	1	4	2	1	2	2	1	1	1	2	1	2	1	1	1
2	1	2	2	2	4	3	1	3	3	0	3	3	2	1	1	1	1
1	1	1	2	3	1	1	3	1	1	2	2	2	2	1	2	1	1
1	1	2	1	2	4	1	2	2	3	1	3	1	2	1	1	3	2
1	2	1	2	3	1	3	1	3	2	0	2	2	2	1	1	4	2
2	1	1	1	3	1	1	2	2	2	1	1	2	1	2	1	1	1
2	1	1	1	2	1	1	1	1	3	1	3	2	1	1	1	2	2
1	1	1	2	3	4	3	2	2	1	0	2	1	2	1	1	2	2
2	2	1	1	2	2	1	2	2	1	0	2	3	1	2	2	1	1
1	2	1	2	4	1	1	1	1	3	2	1	1	2	1	1	1	1
1	1	2	2	2	4	4	3	3	1	1	3	2	2	2	1	1	1
2	1	1	1	2	4	1	3	2	3	0	3	3	1	1	2	1	1
2	1	1	2	3	1	1	3	1	3	0	2	3	1	2	2	2	2
2	1	1	2	4	4	1	3	2	1	2	2	3	2	1	2	4	2
2	1	1	2	2	4	3	2	2	2	0	3	3	2	1	1	2	2
1	1	1	1	3	1	2	3	3	3	2	2	1	2	1	2	2	2
1	1	1	2	2	1	2	3	2	3	1	2	3	1	2	1	4	2
2	1	1	1	3	3	3	1	1	2	0	1	3	1	2	1	1	1
1	2	1	2	4	1	1	3	3	1	1	3	2	2	1	2	1	1
1	1	1	2	2	4	2	2	2	1	0	1	1	2	2	1	1	1
2	1	1	1	2	2	4	3	2	2	0	3	2	2	1	1	2	2
2	1	1	2	2	2	1	2	3	3	2	2	3	2	1	1	1	1
2	1	1	2	2	1	3	2	3	2	2	2	1	2	1	1	2	2
1	2	2	2	2	4	2	2	3	1	2	2	1	2	1	1	4	2
1	1	1	2	4	4	1	1	2	1	0	3	2	1	2	1	2	2
2	1	2	1	2	4	1	1	1	3	1	1	3	2	2	1	1	1
1	1	2	2	2	1	3	2	1	2	0	1	1	1	2	1	3	2
1	1	1	1	2	3	4	3	3	1	0	3	2	1	1	2	1	1
2	2	1	1	3	3	1	2	1	3	2	3	1	2	1	1	2	2
1	1	1	2	3	4	3	2	3	3	0	3	2	2	1	1	2	2
2	1	1	1	3	2	1	2	1	3	1	1	3	1	2	1	1	1
1	1	1	2	2	1	3	3	3	1	0	3	1	2	1	2	1	1
1	2	2	2	2	4	1	2	2	3	2	3	1	2	2	1	1	1
2	1	1	1	2	4	1	1	2	1	2	2	2	2	1	2	2	2
2	1	1	2	2	4	1	2	3	2	1	1	2	1	1	1	1	1
1	1	2	2	1	3	2	2	1	2	1	2	1	2	1	2	2	2
1	1	1	1	2	4	1	3	1	2	2	3	3	2	2	1	1	1
1	1	1	2	2	1	1	2	3	3	0	2	1	2	1	2	1	1
2	1	1	1	2	3	1	1	2	2	2	3	3	2	2	1	3	2
2	1	1	1	4	1	1	2	1	2	1	1	3	1	1	1	4	2
2	2	1	1	2	1	1	2	2	2	0	3	1	1	1	1	2	2
2	1	1	2	2	3	3	1	1	1	1	3	3	2	2	2	1	1
1	1	1	1	2	2	3	3	1	1	2	3	2	2	1	1	2	2
1	1	1	1	3	4	1	3	2	1	2	1	2	2	1	1	1	1
1	1	1	2	3	1	1	1	3	3	0	2	2	2	1	1	4	2
2	2	1	2	2	1	3	1	2	2	0	2	2	2	1	1	2	2
1	1	1	1	3	4	1	3	3	2	2	3	1	2	1	1	2	2
2	1	1	2	2	4	2	2	3	1	0	3	2	2	1	1	2	2
2	1	1	1	1	3	4	2	2	2	0	1	3	1	2	1	1	1
1	1	1	1	2	1	1	1	3	3	0	1	2	1	1	1	2	2
1	1	2	2	3	2	1	3	1	3	1	3	2	2	1	1	1	1
2	1	1	2	4	1	4	2	3	1	1	3	1	2	1	1	1	1
1	1	1	1	2	4	1	2	2	3	0	1	3	1	2	2	1	1
2	1	1	1	3	4	1	2	1	1	0	3	1	2	2	1	2	2
2	1	2	2	2	1	4	1	2	2	0	2	3	2	1	1	3	2
1	1	1	2	2	4	1	1	2	3	2	3	2	2	2	1	1	1
2	2	1	2	2	4	3	3	3	3	2	1	3	1	1	1	3	2
2	1	1	2	3	1	1	2	1	2	0	2	3	1	1	1	1	1
1	1	1	2	2	1	1	2	2	1	2	3	3	1	1	1	2	2
2	1	1	2	4	4	2	3	3	2	1	2	2	2	1	2	2	2
1	1	1	1	2	4	1	1	2	1	1	1	2	2	2	2	1	1
1	1	1	1	2	2	3	1	1	3	0	2	1	2	1	1	2	2
1	1	1	1	4	4	3	3	1	1	2	3	1	1	1	1	1	1
2	1	1	2	2	3	3	3	2	3	2	3	3	1	1	1	2	2
1	1	1	2	4	4	1	2	3	3	1	3	2	2	1	1	3	2
1	1	1	1	3	3	4	2	3	2	2	3	2	2	1	1	2	2
1	1	2	1	2	3	1	1	2	2	0	1	3	2	2	2	1	1
2	1	1	1	2	4	4	3	3	3	0	2	1	2	1	1	2	2
1	1	1	2	2	1	1	1	3	1	0	2	1	2	2	2	2	2
2	2	1	2	2	1	3	2	1	3	2	2	1	1	2	1	1	1
1	2	1	1	3	3	1	2	3	1	1	2	2	2	1	1	1	1
1	2	2	2	2	1	3	1	2	3	2	1	1	2	2	2	1	1
1	1	1	2	2	1	1	2	2	1	1	3	2	2	1	1	2	2
2	1	2	1	1	4	3	3	2	2	1	3	3	2	2	2	3	2
1	1	2	1	2	1	1	2	3	1	2	2	2	2	1	1	4	2
1	1	1	1	3	4	2	3	1	3	0	3	1	2	1	1	2	2
2	1	1	2	2	4	2	3	3	2	2	3	1	1	1	1	2	2
2	1	1	2	4	4	2	1	2	3	2	3	3	2	1	1	2	2
2	1	1	2	2	1	1	1	1	1	0	3	3	1	2	2	1	1
2	2	1	1	2	4	3	2	2	2	2	2	2	2	1	1	2	2
1	2	2	1	2	2	4	3	2	2	1	3	2	2	1	1	1	1
1	2	1	2	3	1	1	3	3	3	1	2	1	1	2	1	3	2
1	1	1	1	3	1	1	1	1	3	0	1	1	2	1	2	2	2
2	1	1	1	3	4	3	1	1	1	0	1	1	2	2	2	1	1
2	1	1	1	2	3	1	2	3	3	2	3	3	2	1	1	2	2
1	1	1	2	2	2	4	3	2	3	0	2	2	2	1	2	2	2
1	2	1	2	3	4	1	2	1	1	0	2	3	1	2	1	4	2
1	1	1	1	2	3	1	3	1	1	1	2	2	1	2	1	1	1
1	1	1	2	3	3	3	1	3	3	1	1	3	2	1	1	1	1
1	1	1	2	2	4	1	2	3	2	2	3	1	1	1	1	1	1
2	1	2	2	2	1	3	3	2	3	2	2	3	2	1	1	3	2
2	1	2	1	2	1	1	2	2	3	0	1	2	2	2	2	1	1
2	1	1	1	3	3	1	1	3	1	0	3	1	2	1	2	2	2
1	2	1	2	2	1	1	1	3	3	1	1	1	2	1	1	4	2
1	1	1	2	4	3	3	3	1	2	2	3	2	2	2	1	2	2
1	1	2	2	2	4	2	1	3	2	1	2	1	2	1	1	3	2
2	2		2	2	4	1	2	2	3	0	3	3	1	1	1	2	2
1	1	1	1	3	1	3	3	3	2	2	2	1	2	1	2	2	2
2	2	2	1	2	3	1	1	1	1	0	1	3	1	2	2	1	1
1	2	1	2	4	4	1	2	3	3	2	3	1	2	1	1	1	1
1	1	1	2	2	3	1	2	2	2	1	3	2	2	2	1	1	1
1	1	1	1	2	1	4	1	3	1	2	1	3	1	1	2	1	1
2	1	1	2	3	4	3	3	3	2	0	3	1	2	1	1	1	1
1	1	1	2	2	4	1	3	1	1	1	3	2	2	2	1	1	1
2	1	1	1	2	2	1	1	1	3	0	1	3	2	1	1	2	2
2	1	1	2	3	1	3	2	2	2	2	3	2	2	1	1	2	2
1	1	1	2	2	4	4	3	3	2	1	2	1	2	2	1	3	2
1	1	1	1	3	1	1	1	1	3	0	1	3	1	2	2	1	1
2	1	2	2	2	4	3	2	3	2	1	3	2	2	1	1	1	1
1	2	1	1	3	4	4	1	1	3	0	2	1	2	1	2	2	2
2	1	1	2	2	4	2	1	2	3	0	3	3	1	2	1	1	1
1	1	1	1	2	1	1	3	1	1	1	1	1	2	1	2	1	1
1	1	2	2	2	4	4	2	3	3	2	2	1	2	1	1	1	1
2	1	1	2	3	1	1	1	2	3	1	3	2	1	2	2	1	1
2	1	1	2	2	3	1	2	2	3	0	2	2	1	2	1	2	2
1	1	2	1	3	1	1	1	3	2	0	2	2	2	1	1	4	2
1	1	1	1	2	4	3	2	3	3	0	1	3	2	1	1	1	1
1	2	1	2	4	2	1	1	2	3	2	2	1	1	1	1	1	1
2	1	1	1	2	1	1	3	3	2	1	2	2	2	1	1	1	1
1	1	2	1	2	4	1	3	3	3	1	2	2	1	1	2	3	2
2	1	1	2	3	3	1	2	3	3	1	1	3	2	2	1	4	2
2	1	1	1	4	2	1	1	1	2	1	3	3	2	1	1	2	2
1	2	1	1	2	4	1	2	2	2	0	2	3	2	2	2	1	1
1	1	1	2	2	1	3	3	3	3	0	3	1	2	1	1	2	2
2	1	1	2	1	3	4	3	2	2	2	1	3	2	1	2	2	2
1	1	1	2	2	4	2	2	3	3	0	1	1	2	1	1	2	2
1	1	1	2	2	4	1	2	1	1	1	1	3	2	2	1	1	1
2	2	1	1	2	1	1	1	1	1	0	3	2	2	1	2	2	2
2	1	2	1	3	3	3	1	2	3	2	2	1	1	2	2	1	1
1	2	1	2	2	2	1	3	3	3	0	3	3	2	1	1	1	1
1	1	1	2	4	3	3	2	1	3	2	2	2	2	1	1	1	1
2	1	1	1	2	4	1	3	3	2	1	1	1	1	2	2	1	1
2	1	1	1	4	1	1	2	2	1	2	1	1	1	1	1	2	2
1	1	1	2	2	3	2	3	1	3	2	1	3	2	1	1	4	2
1	1	1	1	3	4	3	1	3	3	0	2	3	2	1	1	2	2
1	2	1	2	4	1	1	1	2	2	0	1	1	2	1	1	3	2
2	1	1	2	2	4	2	3	2	2	2	3	3	2	1	1	2	2
1	1	1	2	2	2	1	3	1	2	2	3	1	2	1	1	2	2
2	1	1	1	3	1	1	1	2	2	0	2	3	1	2	2	1	1
1	1	2	2	4	3	4	3	1	3	2	1	1	2	1	1	1	1
1	2	1	1	2	2	1	2	3	2	1	3	2	2	1	1	1	1
2	2	1	1	3	1	1	1	2	3	0	1	3	1	1	1	2	2
1	1	1	2	2	1	1	2	3	2	0	3	1	1	2	1	1	1
1	1	1	1	3	4	3	1	1	1	2	2	3	2	1	2	1	1
1	1	1	2	2	4	3	3	3	3	1	2	1	1	1	1	3	2
2	1	1	2	3	3	3	3	3	3	0	3	2	2	2	1	3	2
1	1	1	2	2	4	2	2	1	2	1	2	1	2	1	1	2	2
2	1	1	1	2	4	1	1	2	3	0	1	2	1	1	1	4	2
2	2	1	1	2	3	1	3	3	3	2	3	3	2	1	1	2	2
2	1	1	2	2	1	3	1	2	3	0	2	2	2	1	2	2	2
1	1	2	1	2	1	1	1	1	2	0	1	3	1	2	2	1	1
1	1	2	2	2	4	2	3	3	1	2	3	3	2	1	1	2	2
2	1	2	1	3	4	2	3	2	2	2	2	3	2	1	1	3	2
2	1	2	2	4	1	4	2	3	2	2	1	3	2	1	1	4	2
2	2	1	1	2	3	4	3	3	2	0	2	3	2	1	1	2	2
1	2	1	2	3	4	1	1	1	2	0	3	1	1	1	1	2	2
2	1	1	2	3	1	1	1	1	1	0	2	3	1	2	2	1	1
1	1	2	2	1	3	3	2	3	3	2	1	1	2	1	1	1	1
1	1	1	1	2	4	1	2	2	2	1	2	2	2	2	1	1	1
2	1	1	2	2	1	4	3	3	3	0	3	1	1	1	2	1	1
1	1	2	1	4	4	1	3	2	1	2	1	3	2	2	1	1	1
2	1	1	1	2	3	1	2	3	1	0	3	2	2	2	1	2	2
1	2	1	1	3	3	3	2	3	1	1	2	2	1	2	2	4	2
1	1	1	2	4	1	2	1	1	3	2	2	1	2	1	2	2	2
1	1	1	2	3	1	1	1	1	2	0	3	2	2	2	2	1	1
1	1	2	2	1	2	1	3	1	1	1	1	3	1	1	2	3	2
2	1	2	1	2	4	3	2	2	3	1	3	2	2	1	1	1	1
1	1	1	2	2	4	1	1	3	1	2	2	3	1	1	1	1	1
1	2	1	2	2	3	2	1	3	3	2	3	1	2	1	2	1	1
2	1	1	2	3	1	1	3	2	3	0	3	3	2	1	1	4	2
1	1	1	2	2	3	1	2	3	3	0	2	1	2	2	1	1	1
2	1	1	1	2	1	1	2	1	1	0	2	2	1	1	2	2	2
2	2	1	1	3	1	1	3	1	2	1	2	3	1	1	2	1	1
1	1	1	2	2	2	4	1	3	1	0	3	2	2	1	1	1	1
1	2	2	2	4	3	1	2	2	3	1	2	1	2	2	1	1	1
2	1	1	1	2	1	1	3	3	3	1	3	3	1	1	2	1	1
1	1	1	2	3	4	3	2	1	2	0	2	2	2	1	1	1	1
1	1	1	1	2	1	1	2	2	3	0	2	2	1	1	1	2	2
2	2	1	2	3	4	2	3	3	2	0	3	3	2	1	1	2	2
1	1	1	2	2	3	3	3	3	3	2	1	3	2	1	1	2	2
2	2	1	1	3	4	3	2	2	1	0	2	3	2	2	2	1	1
1	1	1	1	2	1	2	1	1	2	0	3	3	1	1	1	4	2
1	1	2	2	3	1	1	1	1	3	2	1	2	1	1	1	1	1
1	1	1	1	2	2	4	3	3	2	0	3	1	2	1	1	1	1
2	1	1	2	2	1	1	1	2	3	1	1	3	2	2	2	1	1
2	1	1	1	3	1	1	1	2	1	0	1	1	2	2	1	2	2
1	2	1	2	4	4	3	3	3	1	2	3	2	2	1	2	2	2
1	2	1	2	2	1	1	1	2	2	0	2	1	2	2	1	3	2
2	1	1	2	2	1	3	1	1	2	0	2	2	1	2	1	1	1
1	1	2	1	2	4	1	3	3	1	2	3	1	2	1	2	1	1
1	1	1	2	4	4	3	2	2	3	1	3	3	2	1	1	1	1
1	1	1	2	3	1	1	2	1	3	0	2	1	1	2	1	1	1
1	1	1	1	2	1	1	2	2	2	0	2	2	2	1	1	2	2
2	1	1	1	3	4	2	3	3	3	2	2	3	1	1	2	2	2
2	1	1	1	1	4	4	1	3	2	0	3	2	2	1	1	1	1
1	1	1	2	2	1	3	3	2	3	1	2	1	1	1	2	1	1
2	1	1	1	2	1	3	1	3	2	1	2	3	2	1	1	2	2
2	2	2	2	4	4	2	3	1	3	0	2	2	2	2	1	3	2
2	2	1	2	2	1	1	1	1	3	1	3	3	2	2	1	1	1
1	1	2	1	3	1	1	3	3	1	2	2	1	2	1	2	1	1
1	1	1	2	2	3	1	2	1	1	0	3	3	2	1	1	2	2
1	1	1	2	3	3	1	2	3	1	2	1	3	2	2	1	4	2
2	1	1	1	2	3	4	3	3	3	2	1	1	2	1	1	2	2
1	2	1	2	2	2	1	3	3	2	2	2	3	1	1	2	2	2
2	2	1	2	3	3	1	2	1	2	1	3	2	2	2	2	1	1
2	1	1	2	2	4	2	2	2	3	2	2	2	2	1	1	2	2
1	1	1	1	3	4	3	1	3	2	2	3	3	2	1	1	1	1
1	1	1	2	2	4	1	3	1	3	0	3	1	2	1	1	2	2
2	1	1	2	2	1	3	1	3	3	2	3	2	2	1	1	2	2
1	1	1	2	2	1	1	1	1	3	0	2	1	1	2	2	1	1
1	1	1	2	4	3	4	3	2	1	2	3	2	2	1	1	1	1
1	1	2	2	3	4	1	3	3	3	1	2	1	2	1	1	1	1
2	2	2	2	3	1	1	1	3	3	1	3	2	2	2	1	4	2
2	1	1	1	2	3	2	2	1	2	1	2	1	2	1	2	1	1
2	1	1	1	1	1	4	2	2	1	0	3	1	2	1	1	2	2
1	1	2	1	3	3	1	3	2	2	1	3	2	2	1	1	3	2
1	2	1	2	2	1	1	3	3	3	0	2	3	2	1	1	1	1
1	1	2	1	2	4	1	1	3	2	2	3	2	2	1	2	2	2
2	1	1	2	3	4	1	1	1	2	1	2	3	1	2	1	1	1
1	1	1	2	2	1	1	3	3	1	0	2	2	2	1	2	1	1
1	2	1	1	2	3	1	2	2	3	2	2	1	1	2	1	1	1
2	1	1	2	2	2	1	1	1	3	2	3	3	2	1	1	1	1
1	1	1	1	2	1	3	3	3	2	0	2	1	2	2	1	1	1
1	1	1	1	4	3	2	2	2	3	0	1	2	1	1	1	2	2
2	1	1	2	2	1	1	1	2	2	2	2	3	2	1	2	2	2
2	2	1	2	3	4	1	1	3	3	2	2	3	1	2	2	1	1
1	2	2	1	2	1	4	3	1	1	1	3	1	2	1	1	1	1
1	1	1	2	2	4	1	2	2	2	0	3	2	2	1	1	1	1
1	1	2	1	2	1	1	1	3	1	0	2	2	1	1	1	4	2
2	2	1	2	2	1	3	3	2	3	2	3	3	2	1	1	2	2
2	1	1	2	1	3	4	1	3	3	2	2	3	2	2	1	1	1
1	1	2	1	2	2	1	3	1	1	0	1	1	2	1	2	1	1
2	1	1	1	2	4	1	1	1	2	0	3	1	2	2	1	2	2
1	1	1	1	3	3	2	3	3	1	1	2	2	2	1	1	2	2
2	1	1	2	4	1	3	1	3	3	1	2	3	1	2	1	1	1
1	2	1	2	3	3	1	2	1	2	0	3	2	2	1	2	1	1
1	2	1	2	2	4	2	2	3	1	2	2	1	1	2	1	1	1
2	1	1	2	4	1	1	3	2	3	2	2	3	2	1	1	1	1
1	2	1	2	3	1	3	1	1	3	0	3	2	1	1	1	1	1
1	1	1	2	2	4	4	3	3	3	1	2	1	2	2	2	1	1
1	1	1	2	4	1	3	1	1	2	2	2	2	2	2	1	3	2
2	1	1	2	2	4	1	1	3	2	2	3	3	2	1	1	1	1
1	1	1	1	2	3	1	1	1	2	2	3	3	1	1	2	2	2
2	2	1	2	3	4	3	2	2	3	2	3	2	2	1	1	2	2
1	1	2	1	3	1	1	2	2	1	0	2	3	2	2	2	1	1
2	1	1	2	2	4	3	3	3	3	0	3	3	2	1	1	2	2
2	1	1	1	2	1	1	1	1	2	1	3	2	1	1	1	1	1
2	1	1	2	2	3	2	3	2	1	2	1	1	1	2	1	3	2
2	2	1	1	3	1	2	1	2	2	2	3	2	2	1	1	2	2
1	1	1	2	2	4	1	3	3	1	0	3	3	2	1	2	2	2
1	1	2	2	3	1	1	1	3	3	0	1	2	1	2	1	4	2
2	1	2	1	2	1	1	2	3	2	0	3	1	2	2	1	1	1
1	1	1	2	2	3	1	1	2	3	2	3	3	2	1	2	1	1
1	1	1	1	2	1	2	2	3	3	0	2	1	1	1	1	2	2
2	1	1	2	2	1	1	3	1	1	2	2	2	1	1	1	1	1
1	1	1	2	4	2	4	3	3	2	2	2	3	2	1	1	2	2
2	1	1	2	2	4	3	1	1	3	0	3	2	2	1	1	2	2
1	2	1	1	2	4	4	3	2	2	2	3	3	2	1	1	2	2
1	1	2	1	2	4	2	1	2	2	0	3	3	2	2	1	3	2
2	1	1	1	3	1	4	1	1	3	0	1	3	1	2	2	1	1
1	1	1	2	4	2	1	3	3	1	1	2	1	2	1	1	1	1
2	1	1	2	2	1	3	2	2	3	0	3	2	1	1	1	1	1
1	1	1	1	2	3	1	1	1	2	2	3	3	2	2	2	1	1
1	1	1	2	3	1	2	3	3	3	1	2	1	1	1	1	1	1
2	1	1	2	2	1	1	2	2	1	0	3	1	2	1	1	1	1
2	1	1	1	3	3	1	1	2	3	0	2	2	2	1	1	2	2
1	1	1	2	2	4	1	3	1	2	1	3	3	2	2	2	1	1
2	1	1	1	2	4	3	3	3	1	2	3	1	2	1	1	1	1
1	1	2	2	2	3	1	1	2	2	1	2	2	1	1	1	1	1
1	2	1	2	2	4	2	1	3	3	0	3	2	2	2	2	2	2
2	1	1	2	3	4	2	2	2	3	0	2	3	2	2	1	1	1
1	1	2	1	1	1	3	3	1	3	2	3	1	2	1	1	1	1
1	1	1	2	2	2	1	1	3	2	1	2	2	2	1	1	1	1
1	1	1	1	3	1	1	1	2	2	0	2	3	2	1	1	2	2
2	1	1	1	2	3	2	3	3	1	2	1	3	1	2	2	1	1
1	1	2	2	2	4	3	3	1	3	0	3	2	2	1	2	3	2
1	1	1	1	2	4	3	2	1	3	0	1	3	1	1	1	2	2
1	1	1	2	3	4	1	2	2	3	0	3	3	1	2	1	1	1
2	1	1	1	4	1	1	3	1	1	2	2	1	2	1	1	1	1
1	1	1	1	3	1	3	1	3	3	1	3	2	2	1	2	1	1
1	1	2	1	2	1	1	1	3	3	1	3	1	1	2	2	4	2
2	1	2	2	3	1	1	1	2	2	1	2	2	2	1	1	2	2
2	1	1	1	2	1	1	3	2	2	0	2	3	2	2	2	1	1
2	1	1	1	4	3	3	2	2	1	2	2	3	2	1	2	2	2
1	1	1	2	2	1	4	1	3	1	2	2	1	1	1	1	1	1
2	1	1	1	4	1	1	3	1	3	1	2	3	2	1	1	1	1
1	1	2	2	3	4	1	2	3	2	0	3	1	2	1	1	1	1
2	2	1	2	2	1	2	3	3	2	2	3	2	1	2	2	1	1
2	1	1	1	3	3	4	1	1	2	2	1	1	2	2	1	3	2
1	1	1	1	2	1	1	1	1	3	1	3	1	2	1	1	1	1
1	1	1	2	3	3	1	1	2	1	0	2	2	1	1	2	2	2
2	1	1	2	2	1	1	2	2	1	0	2	3	1	2	2	1	1
1	1	1	1	2	3	3	1	1	3	2	2	2	2	1	1	1	1
2	1	1	2	4	1	1	3	3	2	1	3	3	1	2	1	1	1
1	1	1	2	2	3	3	1	3	3	0	2	1	2	1	2	1	1
1	1	2	1	2	1	1	3	1	1	2	3	1	1	1	1	1	1
2	1	1	1	1	4	1	2	2	2	0	2	3	2	2	1	2	2
2	1	1	2	2	1	1	2	1	3	0	2	3	2	2	1	1	1
1	1	1	1	2	1	1	3	3	2	2	2	1	1	1	1	1	1
1	2	1	2	2	2	3	1	2	3	1	3	2	2	1	2	1	1
1	1	1	2	2	1	1	3	1	2	0	2	3	2	2	1	1	1
2	1	1	2	4	4	4	1	3	1	1	2	2	2	1	1	2	2
1	1	1	2	2	1	3	1	2	3	0	2	1	1	1	1	2	2
2	1	1	1	3	3	2	1	2	2	2	2	1	2	2	1	1	1
1	1	1	2	2	4	2	1	3	3	0	2	3	2	2	1	3	2
1	1	1	2	3	4	1	3	2	2	1	3	2	1	1	2	1	1
1	1	1	1	2	4	1	2	2	3	2	2	2	2	1	2	2	2
2	1	1	2	4	3	2	1	3	2	0	3	3	1	1	1	2	2
1	1	1	2	3	4	2	3	2	3	2	2	3	2	1	1	2	2
2	1	1	1	2	1	1	1	1	1	0	2	3	1	1	1	1	1
1	1	2	2	2	4	1	3	3	3	2	2	1	2	1	1	1	1
2	1	1	1	2	3	1	2	2	2	0	3	1	2	1	1	2	2
1	1	1	2	2	4	1	2	3	2	1	3	2	2	1	2	1	1
1	1	2	1	2	1	3	1	1	2	2	2	2	2	1	1	3	2
2	2	2	1	1	1	1	1	2	3	0	2	1	1	1	1	1	1
1	1	1	2	2	3	2	1	1	3	2	3	3	2	1	1	2	2
2	1	1	1	2	4	2	2	3	3	0	2	2	1	1	1	2	2
1	1	1	2	2	3	3	2	1	3	2	3	3	1	2	2	1	1
2	1	1	1	4	2	1	3	3	1	1	2	2	2	1	1	1	1
1	1	2	1	3	1	1	1	3	1	0	2	2	1	2	1	4	2
1	1	1	2	3	1	2	1	3	3	0	3	1	2	1	1	1	1
1	1	2	2	2	4	3	3	2	2	2	2	1	2	1	2	1	1
1	1	2	2	2	1	1	1	2	1	2	2	2	2	1	2	2	2
2	1	1	1	3	1	2	2	3	3	2	3	2	1	1	1	1	1
1	1	1	2	2	1	1	3	1	2	0	2	1	2	2	2	1	1
1	1	1	2	2	4	2	3	3	3	1	2	1	2	1	1	1	1
2	1	1	1	3	4	3	2	2	2	0	2	3	1	1	1	2	2
1	1	1	1	1	1	3	2	2	2	1	3	2	1	2	2	1	1
2	1	1	2	2	4	1	3	3	1	0	2	1	2	1	1	1	1
1	2	1	2	2	1	1	1	1	3	1	3	1	2	1	1	1	1
1	1	1	2	2	3	3	3	3	3	0	2	2	1	2	2	1	1
1	1	1	2	2	3	1	1	2	1	1	2	2	2	1	2	2	2
1	1	1	2	2	2	2	1	3	3	0	1	1	2	1	1	3	2
2	1	2	1	2	3	1	1	1	2	2	2	1	1	1	1	1	1
2	1	1	2	1	3	2	2	3	2	0	2	2	2	1	1	2	2
1	1	1	1	2	4	3	1	2	3	2	1	1	1	2	1	2	2
1	1	1	1	3	1	1	2	2	1	0	3	2	2	2	2	1	1
2	2	1	2	2	4	4	1	3	2	0	3	3	2	1	1	2	2
1	1	1	2	2	1	1	1	3	3	2	2	1	2	1	1	1	1
1	1	2	1	4	2	4	3	1	3	1	3	2	1	1	1	1	1
2	1	1	1	2	4	1	2	2	3	1	3	2	1	1	1	2	2
2	1	2	2	3	1	2	2	2	2	2	2	1	2	2	1	1	1
2	1	1	1	2	1	3	1	3	3	2	2	3	2	2	1	3	2
1	1	1	2	2	1	1	3	1	2	0	3	2	1	1	1	1	1
2	1	1	1	3	1	2	1	3	1	2	2	3	2	1	1	2	2
1	2	1	1	2	3	3	3	3	3	1	2	1	2	2	1	1	1
2	1	2	2	3	1	1	2	3	1	0	1	2	1	1	1	4	2
1	1	1	2	2	4	1	3	2	3	2	3	2	2	1	2	2	2
2	1	1	2	4	1	2	1	2	2	0	3	2	2	2	1	1	1
1	1	1	2	3	4	1	3	1	1	1	2	1	1	1	1	1	1
1	1	1	2	2	3	1	2	3	3	1	3	1	2	1	1	1	1
1	1	1	2	2	4	3	1	1	3	2	2	2	2	2	1	3	2
2	1	1	1	2	1	1	3	3	3	2	3	2	1	1	2	1	1
1	2	1	2	3	3	2	1	2	3	0	3	1	2	2	2	1	1
2	1	1	1	2	3	1	1	2	3	0	2	2	2	1	1	2	2
1	1	1	1	2	4	1	3	1	2	1	2	1	2	1	1	1	1
1	1	1	2	4	3	2	1	3	3	2	2	1	1	1	1	2	2
1	1	1	1	2	1	3	3	3	2	0	2	2	2	2	1	4	2
2	1	2	1	2	1	2	1	3	2	2	3	1	1	2	2	1	1
2	1	1	1	1	1	1	1	2	1	1	2	2	2	2	2	2	2
1	1	1	2	2	1	3	3	2	1	0	3	1	2	1	1	1	1
1	1	1	2	3	4	1	2	3	3	2	3	1	2	1	1	1	1
2	1	1	2	2	1	2	3	3	2	1	2	1	2	1	1	1	1
1	1	1	1	2	2	1	2	3	2	0	2	3	2	1	1	2	2
2	1	2	2	3	4	3	3	2	1	2	2	2	1	1	1	2	2
1	1	1	1	2	4	2	1	3	3	2	3	3	2	1	1	2	2
2	1	2	1	3	2	3	1	1	3	0	2	1	2	2	1	3	2
2	2	1	1	2	4	1	1	1	2	0	3	1	1	2	2	1	1
1	1	1	2	4	4	3	3	3	3	2	2	2	2	1	1	1	1
1	1	2	2	2	4	1	2	2	1	1	2	1	1	1	1	1	1
2	1	1	1	2	1	1	3	1	3	0	3	2	2	2	1	1	1
1	1	1	2	2	3	2	1	3	2	2	2	1	2	1	1	1	1
1	1	1	2	3	1	1	3	2	3	2	3	1	1	1	1	1	1
2	1	2	2	2	3	1	1	3	3	1	1	1	1	1	1	4	2
2	1	1	1	2	1	1	2	3	1	2	2	2	2	2	2	1	1
2	1	1	1	2	1	4	1	2	2	0	2	2	1	1	2	2	2
1	1	1	2	4	4	1	2	3	3	2	2	1	2	1	1	2	2
1	1	1	2	3	3	2	1	1	2	0	3	2	1	2	1	1	1
2	1	1	1	2	1	1	3	2	1	2	3	1	2	1	2	1	1
1	2	2	2	2	3	3	3	3	2	1	2	1	2	1	1	1	1
2	1	1	2	3	3	3	3	2	3	2	3	3	2	1	1	2	2
2	1	1	2	2	2	2	1	3	3	0	3	2	2	2	1	1	1
1	1	1	1	3	1	1	1	3	2	0	1	3	1	1	1	2	2
1	1	1	1	3	4	2	3	1	2	1	3	1	1	1	1	1	1
2	1	1	2	4	1	1	2	3	3	0	2	2	2	2	1	1	1
1	1	1	2	2	4	2	3	3	3	1	3	1	1	1	1	1	1
1	1	1	1	2	4	1	3	2	2	2	2	1	2	1	2	1	1
2	1	1	1	2	1	1	1	3	2	2	2	2	2	1	2	4	2
1	1	1	1	2	4	3	1	2	1	2	2	3	1	1	1	2	2
2	1	1	2	2	4	1	1	1	1	0	3	2	2	2	1	1	1
1	1	1	2	3	2	1	2	3	3	0	3	2	2	1	2	2	2
1	1	2	1	2	1	1	3	2	2	2	2	1	1	1	2	1	1
2	1	1	2	2	4	2	2	3	3	1	3	2	2	2	1	1	1
1	2	1	2	2	1	1	3	1	3	0	3	1	2	1	1	1	1
2	1	1	1	2	4	1	3	2	2	2	2	1	2	1	1	2	2
1	1	1	1	3	1	1	1	3	2	2	2	1	1	2	1	1	1
1	1	1	2	2	4	3	3	2	2	1	3	2	2	1	1	1	1
1	1	2	2	2	3	4	2	3	3	0	1	3	1	2	1	4	2
1	1	1	2	2	4	3	1	3	1	1	1	3	2	1	1	2	2
2	1	1	1	2	1	2	1	3	1	2	2	1	2	2	1	1	1
1	1	1	2	4	2	1	3	1	3	0	3	2	1	1	1	1	1
2	1	1	1	2	4	2	2	2	3	1	2	3	1	1	1	2	2
2	1	2	2	2	1	1	2	2	3	2	3	1	2	2	2	1	1
1	1	2	2	3	3	1	1	3	1	2	2	1	2	1	1	2	2
1	1	2	1	2	4	2	1	2	1	0	1	1	1	1	2	3	2
1	1	1	1	1	3	1	1	1	2	0	3	2	1	1	1	1	1
2	1	1	1	2	4	1	1	3	1	2	1	2	2	2	1	4	2
2	2	1	2	3	4	4	3	2	1	2	3	1	2	2	2	1	1
1	1	1	1	4	4	2	2	2	2	2	1	3	2	1	2	2	2
2	1	1	2	2	4	3	3	3	3	1	2	3	1	1	1	2	2
1	1	1	1	2	1	2	2	1	3	0	2	2	1	1	1	1	1
1	1	2	1	3	3	1	1	3	1	1	2	1	2	1	1	4	2
1	1	1	1	1	3	1	1	2	3	0	3	2	2	2	2	2	2
2	1	1	2	2	2	1	1	2	2	1	3	2	1	2	1	1	1
1	2	1	1	1	3	3	3	3	1	0	3	1	2	1	2	1	1
1	1	2	2	2	1	1	2	1	3	2	2	1	1	1	1	1	1
2	1	1	2	3	3	1	3	2	3	0	2	2	2	1	1	1	1
1	1	1	1	4	1	4	1	1	1	1	2	1	2	2	2	1	1
1≤47,2＞47	1Male；2 Female	1Married，2 Single.Single including unmarried, divorced and widowed.	1Physical work; 2Mental work	1 ≤Primary school;2 Junior middle school;3 Senior middle school;4 ≥College	1 Non-smoker;2 Former smoker;3 ＜20 gram tobacco/day;4 ≥20 gram tobacco/day	1 Non drinker;2 ≤1 drink/day;3 ＞1 to 2 drinks/day;4 ＞2 drinks/day	BMI,body mass index.1 ＜25;2 25-35;3 ＞35	AHI,apnoea-hypopnea index.1 5-20;2 21-40;3 ＞40	1 ＜65;2 65-84;3 85-92	FBS,Family Burden Scale of Disease.1 0;2 1;3 2	APGAR,Family APGAR Index.1(0～3);2(4～6);3(7～10)	PSSS,Perceived Social Support Scale.1 ＜32;2 33-50;3 ＞50	1 No;2 Yes	Heart disease including coronary heart disease, arrhythmias and heart failure.1No; 2Yes	Diabetes Mellitus contains Type I and Type II diabetes mellitus.1 No;2 Yes	1（＜50）；2（50-59）；3（60-69）；4(＞70）	1Control; 2 With depressive status
